# Supplementary material for: Expeditious assembly of fused dihydropyranones via N-heterocyclic carbene-catalyzed tandem Michael addition/lactonization
Source: Royal Society of Chemistry journal article supplement (doi:10.1039/c6ob02449a), 2017-01-01
Supplement: c6ob02449a1.pdf [file c6ob02449a1.pdf]

**Expeditious assembly of fused dihydropyranones *via N-*  
heterocyclic carbene-catalyzed tandem Michael  
addition/lactonization**

Qiao Ren,\* MUYAO LI, LUJIANG YUAN\*

College of Pharmaceutical Science,  
Southwest University, Chongqing 400715,  
P. R. China

Email: [qren2014@swu.edu.cn](mailto:qren2014@swu.edu.cn)

Email: [yuanlujiang@hotmail.com](mailto:yuanlujiang@hotmail.com)

**Supporting Information**

**Contents:**

|                                                                                |     |
|--------------------------------------------------------------------------------|-----|
| 1. General Information                                                         | S2  |
| 2. Representative Procedure for NHC-Catalyzed Reaction of Ynals with 1,2-Dione | S3  |
| 3. Analytical Data of Fused Dihydropyranones                                   | S3  |
| 4. NMR Spectra of the Products                                                 | S13 |
| 5. HPLC Chromatogram Profile of the Products                                   | S29 |

## 1. General Information

Chemicals and solvents were purchased from commercial suppliers and used as received.  $^1\text{H}$  and  $^{13}\text{C}$  NMR spectra were recorded on a Bruker ACF300 (300 MHz), AVANCE III (400 MHz) or AMX500 (500 MHz) spectrometer. Chemical shifts were reported in parts per million (ppm), and the residual solvent peak was used as an internal reference: proton (chloroform  $\delta$  7.26), carbon (chloroform  $\delta$  77.0) or tetramethylsilane (TMS  $\delta$  0.00) was used as a reference. Multiplicity was indicated as follows: s (singlet), d (doublet), t (triplet), q (quartet), m (multiplet), dd (doublet of doublet), bs (broad singlet). Coupling constants were reported in Hertz (Hz). Low resolution mass spectra were obtained on a Finnigan/MAT LCQ spectrometer in ESI mode. All high resolution mass spectra were obtained on a Finnigan/MAT 95XL-T spectrometer. For thin layer chromatography (TLC), Merck pre-coated TLC plates (Merck 60 F254) were used, and compounds were visualized with a UV light at 254 nm. Flash chromatography separations were performed on Merck 60 (0.040-0.063 mm) mesh silica gel. The enantiomeric excesses of products were determined by chiral phase HPLC analysis. Optical rotations were recorded on Jasco DIP-1000 polarimeter. Melting points were measured with a Tianjin automatic melting point ZRD-1 apparatus.

## 2. Representative Procedure for NHC-Catalyzed Reaction of Ynals with 1,2-Dione

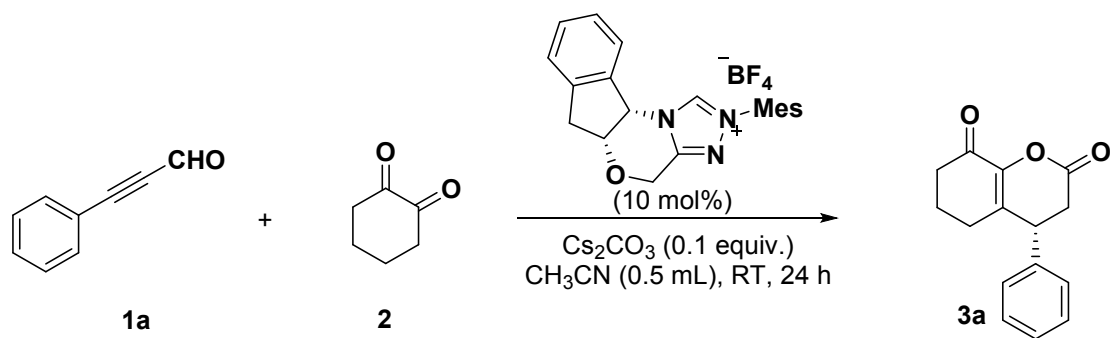

Typical procedure for this reaction:

To a solution of 3-phenylpropionaldehyde **1a** (13.0 mg, 0.1 mmol) and 1,2-cyclohexanedione **2** (16.8 mg, 0.15 mmol) in CH<sub>3</sub>CN (0.5 mL) was added catalyst **VI** (4.2 mg, 0.01 mmol) at room temperature, followed by adding the cesium carbonate (3.3 mg, 0.01 mmol). The resulting reaction mixture was kept stirring at room temperature for 24 h. The crude product was purified by silica gel flash chromatography, eluted by hexane/EtOAc = 1.5:1 to afford the desired product **3a** as colorless oil (20.8 mg, 86% yield).

**Note:** Racemic samples for the standard of chiral HPLC chromatograms were prepared with achiral NHC precursor **VIII** as catalyst.

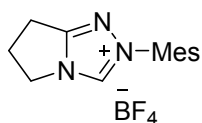

Cat. **VIII**

## 3. Analytical Data of Fused Dihydropyranones

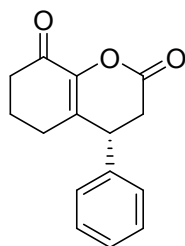

**(R)-4-phenyl-3,4,6,7-tetrahydro-2H-chromene-2,8(5H)-dione (3a)** 20.8 mg, 86% yield; Colorless oil;  $^1\text{H NMR}$  (500 MHz,  $\text{CDCl}_3$ )  $\delta$  (ppm) = 7.34 – 7.26 (m, 3H), 7.13 (d,  $J = 7.1$  Hz, 2H), 3.75 (dd,  $J = 7.5, 4.0$  Hz, 1H), 3.00 (dd,  $J = 16.2, 7.6$  Hz, 1H), 2.82 (dd,  $J = 16.2, 4.0$  Hz, 1H), 2.54 (t,  $J = 6.7$  Hz, 2H), 2.47 – 2.26 (m, 2H), 2.08 – 1.86 (m, 2H);  $^{13}\text{C NMR}$  (125 MHz,  $\text{CDCl}_3$ )  $\delta = 190.06, 165.48, 143.40, 138.37, 136.78, 129.35, 128.11, 127.06, 42.61, 37.56, 35.88, 27.61, 21.86$ ; HRMS (ESI): Exact mass calculated for  $\text{C}_{15}\text{H}_{15}\text{O}_3$   $[\text{M}+\text{H}]^+$  243.1016, found 243.1015; HPLC (Chiralpak AS-H, *i*-propanol/hexane = 40/60, flow rate 1.0 mL/min,  $\lambda = 254$  nm):  $t_{\text{R}}$  (minor) = 26.1 min,  $t_{\text{R}}$  (major) = 36.1 min,  $ee = 98\%$ ;  $[\alpha]_{\text{D}}^{25} = -157.3$  ( $c = 0.83$  in DCM).

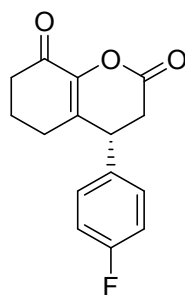

**(R)-4-(4-fluorophenyl)-3,4,6,7-tetrahydro-2H-chromene-2,8(5H)-dione (3b)** 20.9 mg, 80% yield; White solid; mp 104–107 °C;  $^1\text{H NMR}$  (300 MHz,  $\text{CDCl}_3$ )  $\delta = 7.18 - 6.97$  (m, 4H), 3.73 (dd,  $J = 7.4, 3.9$  Hz, 1H), 3.01 (dd,  $J = 16.1, 7.5$  Hz, 1H), 2.82 (dd,  $J = 16.1, 4.0$  Hz, 1H), 2.58 (t,  $J = 6.7$  Hz, 2H), 2.49 – 2.24 (m, 2H), 2.13 – 1.88 (m, 2H);  $^{13}\text{C NMR}$  (100 MHz,  $\text{CDCl}_3$ )  $\delta = 189.91, 165.15, 162.46$  (d,  $^1J_{\text{C-F}} = 246.3$  Hz), 143.57, 136.20, 134.17, 128.82 (d,  $^3J_{\text{C-F}} = 8.1$  Hz), 116.46 (d,  $^2J_{\text{C-F}} = 21.5$  Hz), 42.09, 37.65, 36.10, 27.69, 21.98; HRMS (ESI): Exact mass calculated for  $\text{C}_{15}\text{H}_{14}\text{O}_3\text{F}$   $[\text{M}+\text{H}]^+$  261.0921, found

261.0929; HPLC (Chiralpak AS-H, *i*-propanol/hexane = 40/60, flow rate 1.0 mL/min,  $\lambda$  = 254 nm):  $t_R$

(minor) = 29.9 min,  $t_R$  (major) = 34.2 min,  $ee$  = 96%;  $[\alpha]_D^{25}$  = -174.4 ( $c$  = 0.78 in DCM).

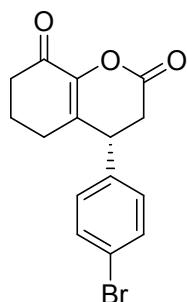

**(R)-4-(4-bromophenyl)-3,4,6,7-tetrahydro-2H-chromene-2,8(5H)-dione (3c)** 24.4 mg, 76% yield;

White solid; mp 169–172 °C;  $^1\text{H NMR}$  (400 MHz,  $\text{CDCl}_3$ )  $\delta$  (ppm) = 7.48 (d,  $J$  = 8.2 Hz, 2H), 7.03 (d,  $J$  = 8.4 Hz, 2H), 3.71 (dd,  $J$  = 7.4, 3.9 Hz, 1H), 3.01 (dd,  $J$  = 16.1, 7.6 Hz, 1H), 2.81 (dd,  $J$  = 16.2, 4.0 Hz, 1H), 2.57 (t,  $J$  = 6.7 Hz, 2H), 2.44 – 2.27 (m, 2H), 2.06 – 1.94 (m, 2H);  $^{13}\text{C NMR}$  (100 MHz,  $\text{CDCl}_3$ )  $\delta$  (ppm) = 189.85, 164.98, 143.69, 137.45, 135.69, 132.65, 128.85, 122.30, 42.29, 37.63, 35.82, 27.69, 21.96; HRMS (ESI): Exact mass calculated for  $\text{C}_{15}\text{H}_{13}\text{O}_3\text{BrNa}$   $[\text{M}+\text{Na}]^+$  242.9940, found 242.9927; HPLC (Chiralpak AS-H, *i*-propanol/hexane = 40/60, flow rate 1.0 mL/min,  $\lambda$  = 254 nm):  $t_R$  (minor) = 30.6 min,  $t_R$  (major) = 36.6 min,  $ee$  = 92%;  $[\alpha]_D^{25}$  = -144.8 ( $c$  = 0.84 in DCM).

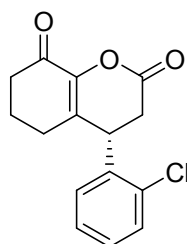

**(S)-4-(2-chlorophenyl)-3,4,6,7-tetrahydro-2H-chromene-2,8(5H)-dione (3d)** 22.9 mg, 83% yield; Colorless oil;  $^1\text{H NMR}$  (300 MHz,  $\text{CDCl}_3$ )  $\delta$  (ppm) = 7.47 – 7.32 (m, 1H), 7.29 – 7.13 (m, 2H), 7.00 (dd,  $J$  = 5.9, 3.4 Hz, 1H), 4.25 (dd,  $J$  = 7.2, 4.3 Hz, 1H), 2.89 (qd,  $J$  = 16.3, 5.9 Hz, 2H), 2.69 – 2.50 (m, 2H), 2.48 – 2.15 (m, 2H), 2.13 – 1.85 (m, 2H);  $^{13}\text{C NMR}$  (75 MHz,  $\text{CDCl}_3$ )  $\delta$  = 189.88, 165.05,

144.47, 135.56, 135.26, 133.71, 130.54, 129.60, 128.00, 127.76, 39.21, 37.70, 34.42, 27.63, 21.98;

HRMS (ESI): Exact mass calculated for C<sub>15</sub>H<sub>14</sub>O<sub>3</sub>Cl [M+K]<sup>+</sup> 277.0626, found 277.0615; HPLC

(Chiralpak AS-H, *i*-propanol/hexane = 40/60, flow rate 1.0 mL/min, λ = 254 nm): *t*<sub>R</sub> (minor) = 30.5 min,

*t*<sub>R</sub> (major) = 52.6 min, *ee* = 98%; [α]<sup>25</sup><sub>D</sub> = +19.5 (*c* = 1.12 in DCM).

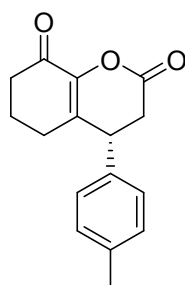

**(R)-4-*p*-tolyl-3,4,6,7-tetrahydro-2H-chromene-2,8(5H)-dione (3e)** 20.3 mg, 79% yield; Colorless

oil; <sup>1</sup>H NMR (500 MHz, CDCl<sub>3</sub>) δ (ppm) = 7.15 (d, *J* = 8.0 Hz, 2H), 7.02 (d, *J* = 8.0 Hz, 2H), 3.70 (dd,

*J* = 7.5, 4.1 Hz, 1H), 2.99 (dd, *J* = 16.1, 7.6 Hz, 1H), 2.82 (dd, *J* = 16.1, 4.1 Hz, 1H), 2.56 (t, *J* = 6.8 Hz,

2H), 2.46 – 2.29 (m, 5H), 2.08 – 1.91 (m, 2H); <sup>13</sup>C NMR (125 MHz, CDCl<sub>3</sub>) δ (ppm) = 190.09, 165.48,

143.44, 138.10, 136.91, 135.37, 130.10, 127.01, 42.44, 37.67, 36.07, 27.71, 21.98, 21.01; HRMS (ESI):

Exact mass calculated for C<sub>16</sub>H<sub>17</sub>O<sub>3</sub> [M+H]<sup>+</sup> 257.1172, found 257.1171; HPLC (Chiralpak AS-H, *i*-

propanol/hexane = 40/60, flow rate 1.0 mL/min, λ = 254 nm): *t*<sub>R</sub> (minor) = 23.6 min, *t*<sub>R</sub> (major) = 34.5

min, *ee* = 97%; [α]<sup>25</sup><sub>D</sub> = -221.7 (*c* = 1.08 in DCM).

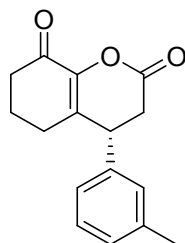

**(R)-4-*m*-tolyl-3,4,6,7-tetrahydro-2H-chromene-2,8(5H)-dione (3f)** 20.7 mg, 81% yield; Colorless

oil; <sup>1</sup>H NMR (500 MHz, CDCl<sub>3</sub>) δ (ppm) = 7.23 (t, *J* = 7.9 Hz, 1H), 7.12 (d, *J* = 7.6 Hz, 1H), 6.93 (br,

2H), 3.69 (dd,  $J = 7.5, 4.0$  Hz, 1H), 2.99 (dd,  $J = 16.2, 7.7$  Hz, 1H), 2.84 (dd,  $J = 16.1, 4.1$  Hz, 1H), 2.61 – 2.53 (m, 2H), 2.47 – 2.35 (m, 2H), 2.33 (s, 3H), 2.08 – 1.90 (m, 2H);  $^{13}\text{C}$  NMR (100 MHz,  $\text{CDCl}_3$ )  $\delta$  (ppm) = 190.05, 165.43, 143.49, 139.30, 138.43, 136.70, 129.31, 129.01, 127.75, 124.19, 42.80, 37.68, 35.98, 27.74, 21.99, 21.40; HRMS (ESI): Exact mass calculated for  $\text{C}_{16}\text{H}_{17}\text{O}_3$   $[\text{M}+\text{H}]^+$  257.1172, found 257.1179; HPLC (Chiralpak AS-H, *i*-propanol/hexane = 40/60, flow rate 1.0 mL/min,  $\lambda = 254$  nm):  $t_{\text{R}}$  (minor) = 26.5 min,  $t_{\text{R}}$  (major) = 33.4 min,  $ee = 98\%$ ;  $[\alpha]_{\text{D}}^{25} = -119.8$  ( $c = 1.11$  in DCM).

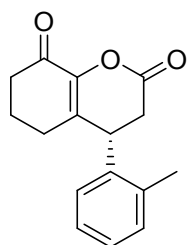

**(*R*)-4-*o*-tolyl-3,4,6,7-tetrahydro-2*H*-chromene-2,8(5*H*)-dione (3g)** 18.3 mg, 71% yield; Colorless oil;  $^1\text{H}$  NMR (500 MHz,  $\text{CDCl}_3$ )  $\delta$  (ppm) = 7.25 – 7.15 (m, 3H), 6.97 (d,  $J = 7.4$  Hz, 1H), 4.02 (dd,  $J = 7.5$  Hz, 4.2, 1H), 3.04 – 2.94 (m, 1H), 2.81 – 2.71 (m, 1H), 2.65 – 2.53 (m, 2H), 2.43 – 2.25 (m, 5H), 2.10 – 1.94 (m, 2H);  $^{13}\text{C}$  NMR (100 MHz,  $\text{CDCl}_3$ )  $\delta$  (ppm) = 189.91, 165.28, 144.27, 136.91, 136.17, 135.52, 131.36, 128.08, 127.23, 126.01, 38.63, 37.73, 35.10, 27.78, 22.03, 19.49; HRMS (ESI): Exact mass calculated for  $\text{C}_{16}\text{H}_{17}\text{O}_3$   $[\text{M}+\text{H}]^+$  257.1172, found 257.1178; HPLC (Chiralpak AS-H, *i*-propanol/hexane = 40/60, flow rate 1.0 mL/min,  $\lambda = 254$  nm):  $t_{\text{R}}$  (minor) = 33.1 min,  $t_{\text{R}}$  (major) = 47.4 min,  $ee = 99\%$ ;  $[\alpha]_{\text{D}}^{25} = -154.5$  ( $c = 0.76$  in DCM).

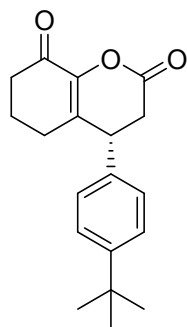

**(R)-4-(4-*tert*-butylphenyl)-3,4,6,7-tetrahydro-2H-chromene-2,8(5H)-dione (3h)** 22.7 mg, 76% yield; White solid; mp 143–145 °C; <sup>1</sup>H NMR (300 MHz, CDCl<sub>3</sub>) δ (ppm) = 7.39 – 7.30 (m, 2H), 7.06 (d, *J* = 8.3 Hz, 2H), 3.71 (dd, *J* = 7.3, 4.0 Hz, 1H), 2.99 (dd, *J* = 16.1, 7.5 Hz, 1H), 2.83 (dd, *J* = 16.1, 4.0 Hz, 1H), 2.57 (t, *J* = 6.7 Hz, 2H), 2.39 (dd, *J* = 9.0, 5.4 Hz, 2H), 2.12 – 1.87 (m, 2H), 1.30 (s, 9H); <sup>13</sup>C NMR (75 MHz, CDCl<sub>3</sub>) (ppm) δ = 190.10, 165.56, 151.25, 143.46, 136.97, 135.24, 126.78, 126.35, 42.34, 37.67, 36.05, 34.53, 31.21, 27.76, 21.98; HRMS (ESI): Exact mass calculated for C<sub>19</sub>H<sub>23</sub>O<sub>3</sub> [M+H]<sup>+</sup> 299.1642, found 299.1649; HPLC (Chiralpak AS-H, *i*-propanol/hexane = 40/60, flow rate 1.0 mL/min, λ = 254 nm): *t*<sub>R</sub> (minor) = 17.5 min, *t*<sub>R</sub> (major) = 23.8 min, *ee* = 98%; [α]<sub>D</sub><sup>25</sup> = -218.7 (*c* = 1.39 in DCM).

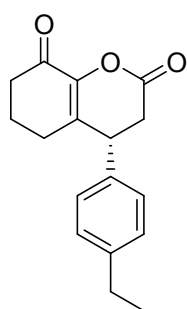

**(R)-4-(4-ethylphenyl)-3,4,6,7-tetrahydro-2H-chromene-2,8(5H)-dione (3i)** 23.8 mg, 88% yield; Colorless oil; <sup>1</sup>H NMR (300 MHz, CDCl<sub>3</sub>) δ (ppm) = 7.17 (d, *J* = 8.1 Hz, 2H), 7.12 – 7.01 (m, 2H), 3.70 (dd, *J* = 7.3, 4.1 Hz, 1H), 2.99 (dd, *J* = 16.1, 7.5 Hz, 1H), 2.83 (dd, *J* = 16.1, 4.2 Hz, 1H), 2.74 – 2.50 (m, 4H), 2.38 (dd, *J* = 11.0, 5.2 Hz, 2H), 2.14 – 1.89 (m, 2H), 1.22 (t, *J* = 7.6 Hz, 3H); <sup>13</sup>C NMR (100 MHz,



CDCl<sub>3</sub>)  $\delta$  (ppm) = 190.04, 165.51, 144.35, 143.44, 136.93, 135.59, 128.89, 127.07, 42.46, 37.67, 36.07, 28.39, 27.73, 21.98, 15.33; HRMS (ESI): Exact mass calculated for C<sub>17</sub>H<sub>19</sub>O<sub>3</sub> [M+H]<sup>+</sup> 271.1329, found 271.1333; HPLC (Chiralpak AS-H, *i*-propanol/hexane = 40/60, flow rate 1.0 mL/min,  $\lambda$  = 254 nm):  $t_R$  (minor) = 23.7 min,  $t_R$  (major) = 33.8 min, *ee* = 98%; [ $\alpha$ ]<sub>D</sub><sup>25</sup> = -164.8 (*c* = 1.01 in DCM).

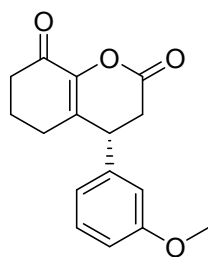

**(R)-4-(3-methoxyphenyl)-3,4,6,7-tetrahydro-2H-chromene-2,8(5H)-dione (3j)** 21.8 mg, 80% yield; Yellow solid; mp 133–136 °C; <sup>1</sup>H NMR (300 MHz, CDCl<sub>3</sub>)  $\delta$  (ppm) = 7.27 (dd, *J* = 9.5, 6.4 Hz, 1H), 6.84 (dd, *J* = 8.1, 2.2 Hz, 1H), 6.72 (d, *J* = 7.6 Hz, 1H), 6.69 – 6.63 (m, 1H), 3.79 (s, 3H), 3.70 (dd, *J* = 7.4, 4.3 Hz, 1H), 3.00 (dd, *J* = 16.2, 7.5 Hz, 1H), 2.84 (dd, *J* = 16.1, 4.3 Hz, 1H), 2.57 (t, *J* = 6.7 Hz, 2H), 2.45 – 2.33 (m, 2H), 2.12 – 1.87 (m, 2H); <sup>13</sup>C NMR (75 MHz, CDCl<sub>3</sub>)  $\delta$  (ppm) = 190.04, 165.35, 160.28, 143.56, 139.93, 136.41, 130.57, 119.26, 113.34, 113.10, 55.27, 42.78, 37.67, 35.91, 27.70, 21.97; HRMS (ESI): Exact mass calculated for C<sub>16</sub>H<sub>17</sub>O<sub>4</sub> [M+H]<sup>+</sup> 273.1121, found 273.1126; HPLC (Chiralpak AS-H, *i*-propanol/hexane = 40/60, flow rate 1.0 mL/min,  $\lambda$  = 254 nm):  $t_R$  (minor) = 48.7 min,  $t_R$  (major) = 55.9 min, *ee* = 94%; [ $\alpha$ ]<sub>D</sub><sup>25</sup> = -145.4 (*c* = 1.36 in DCM).

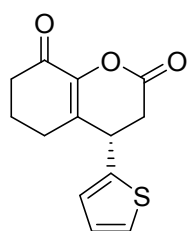

**(S)-4-(thiophen-2-yl)-3,4,6,7-tetrahydro-2H-chromene-2,8(5H)-dione (3k)** 18.3 mg, 74% yield;

White solid; mp 156–157 °C; <sup>1</sup>H NMR (300 MHz, CDCl<sub>3</sub>) δ (ppm) = 7.26 – 7.22 (m, 1H), 6.97 (dd, *J* = 5.1, 3.5 Hz, 1H), 6.92 – 6.85 (m, 1H), 4.11 – 3.87 (m, 1H), 3.14 – 2.89 (m, 2H), 2.66 – 2.44 (m, 4H), 2.17 – 1.93 (m, 2H); <sup>13</sup>C NMR (75 MHz, CDCl<sub>3</sub>) δ (ppm) = 190.01, 165.00, 143.12, 140.52, 136.10, 127.50, 125.36, 125.33, 37.59, 36.47, 27.62, 21.99; Exact mass calculated for C<sub>13</sub>H<sub>13</sub>O<sub>3</sub>S [M+H]<sup>+</sup> 249.0580, found 249.0589; HPLC (Chiralpak AS-H, *i*-propanol/hexane = 40/60, flow rate 1.0 mL/min, λ = 254 nm): *t*<sub>R</sub> (minor) = 32.4 min, *t*<sub>R</sub> (major) = 49.2 min, *ee* = 92%; [α]<sub>D</sub><sup>25</sup> = -168.1 (*c* = 1.18 in DCM).

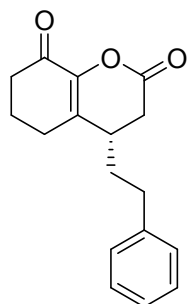

**(S)-4-phenethyl-3,4,6,7-tetrahydro-2H-chromene-2,8(5H)-dione (31)** 22.3 mg, 83% yield; Colorless oil; <sup>1</sup>H NMR (500 MHz, CDCl<sub>3</sub>) δ (ppm) = 7.30 (t, *J* = 7.5 Hz, 2H), 7.21 (t, *J* = 7.4 Hz, 1H), 7.15 (d, *J* = 7.4 Hz, 2H), 2.83 – 2.66 (m, 3H), 2.61 (ddd, *J* = 13.9, 9.2, 7.4 Hz, 1H), 2.55 – 2.37 (m, 5H), 2.09 – 1.89 (m, 3H), 1.79 – 1.68 (m, 1H); <sup>13</sup>C NMR (100 MHz, CDCl<sub>3</sub>) δ (ppm) = 189.69, 166.16, 143.19, 140.14, 138.68, 128.66, 128.21, 126.42, 37.58, 35.79, 33.15, 32.64, 32.54, 27.82, 22.07; Exact mass calculated for C<sub>17</sub>H<sub>19</sub>O<sub>3</sub> [M+H]<sup>+</sup> 271.1329, found 271.1328; HPLC (Chiralpak AS-H, *i*-propanol/hexane = 40/60, flow rate 1.0 mL/min, λ = 254 nm): *t*<sub>R</sub> (minor) = 24.9 min, *t*<sub>R</sub> (major) = 34.1 min, *ee* = 97%; [α]<sub>D</sub><sup>25</sup> = -113.0 (*c* = 0.74 in DCM).

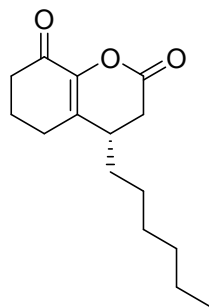

**(S)-4-hexyl-3,4,6,7-tetrahydro-2H-chromene-2,8(5H)-dione (3m)** 20.7 mg, 83% yield; Yellow oil;  $^1\text{H}$  NMR (300 MHz,  $\text{CDCl}_3$ )  $\delta$  (ppm) = 2.66 (d,  $J$  = 4.7 Hz, 2H), 2.61 – 2.37 (m, 4H), 2.14 – 1.96 (m, 2H), 1.82 – 1.51 (m, 2H), 1.49 – 1.14 (m, 9H), 0.87 (t,  $J$  = 6.8 Hz, 3H);  $^{13}\text{C}$  NMR (75 MHz,  $\text{CDCl}_3$ )  $\delta$  (ppm) = 189.83, 166.43, 143.02, 139.29, 37.59, 36.51, 32.89, 31.91, 31.51, 29.09, 27.99, 26.53, 22.51, 22.10, 13.98; Exact mass calculated for  $\text{C}_{15}\text{H}_{23}\text{O}_3$   $[\text{M}+\text{H}]^+$  251.1642, found 251.1640; HPLC (Chiralpak AS-H, *i*-propanol/hexane = 40/60, flow rate 1.0 mL/min,  $\lambda$  = 254 nm):  $t_{\text{R}}$  (minor) = 12.5 min,  $t_{\text{R}}$  (major) = 14.4 min,  $ee$  = 98%;  $[\alpha]_{\text{D}}^{25}$  = -37.8 ( $c$  = 0.55 in DCM).

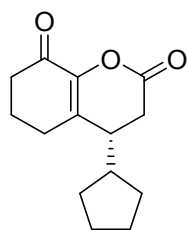

**(R)-4-cyclopentyl-3,4,6,7-tetrahydro-2H-chromene-2,8(5H)-dione (3n)** 15.9 mg, 70% yield; Colorless oil;  $^1\text{H}$  NMR (500 MHz,  $\text{CDCl}_3$ )  $\delta$  (ppm) = 2.74 (dd,  $J$  = 16.0, 2.0 Hz, 1H), 2.62 (dt,  $J$  = 10.8, 5.6 Hz, 2H), 2.57 – 2.43 (m, 3H), 2.28 (t,  $J$  = 6.4 Hz, 1H), 2.11 – 1.98 (m, 2H), 1.96 – 1.81 (m, 2H), 1.80 – 1.45 (m, 7H);  $^{13}\text{C}$  NMR (100 MHz,  $\text{CDCl}_3$ )  $\delta$  (ppm) = 189.83, 166.83, 143.36, 139.95, 43.04, 41.57, 37.70, 32.83, 31.24, 30.31, 29.38, 25.07, 24.10, 22.32; Exact mass calculated for  $\text{C}_{14}\text{H}_{19}\text{O}_3$   $[\text{M}+\text{H}]^+$  235.1329, found 235.1335; HPLC (Chiralpak AS-H, *i*-propanol/hexane = 40/60, flow rate 1.0 mL/min,  $\lambda$  = 254 nm):  $t_{\text{R}}$  (minor) = 18.3 min,  $t_{\text{R}}$  (major) = 26.6 min,  $ee$  = 98%;  $[\alpha]_{\text{D}}^{25}$  = -56.3 ( $c$  = 1.14 in DCM).

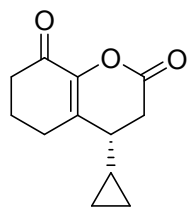

**(R)-4-cyclopropyl-3,4,6,7-tetrahydro-2H-chromene-2,8(5H)-dione (3o)** 14.7 mg, 71% yield;

Colorless oil;  $^1\text{H NMR}$  (300 MHz,  $\text{CDCl}_3$ )  $\delta$  (ppm) = 2.82 – 2.64 (m, 3H), 2.56 – 2.44 (m, 3H), 2.15 – 1.99 (m, 2H), 1.85 – 1.69 (m, 1H), 0.93 – 0.49 (m, 3H), 0.38 (td,  $J = 9.6, 4.6$  Hz, 1H), 0.15 (td,  $J = 9.9, 5.0$  Hz, 1H);  $^{13}\text{C NMR}$  (75 MHz,  $\text{CDCl}_3$ )  $\delta$  (ppm) = 189.99, 166.36, 142.73, 138.53, 41.33, 37.59, 34.17, 27.80, 21.98, 14.02, 5.03, 2.68; Exact mass calculated for  $\text{C}_{12}\text{H}_{15}\text{O}_3$   $[\text{M}+\text{H}]^+$  207.1016, found 207.1017; HPLC (Chiralpak AS-H, *i*-propanol/hexane = 40/60, flow rate 1.0 mL/min,  $\lambda = 254$  nm):  $t_{\text{R}}$  (minor) = 21.7 min,  $t_{\text{R}}$  (major) = 35.3 min,  $ee = 98\%$ ;  $[\alpha]_{\text{D}}^{25} = -115.7$  ( $c = 0.42$  in DCM).

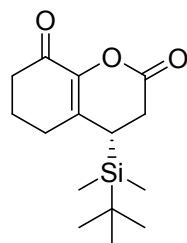

**(S)-4-(tert-butyldimethylsilyl)-3,4,6,7-tetrahydro-2H-chromene-2,8(5H)-dione (3p)** 20.4 mg, 73%

yield; White solid; mp 111–113 °C;  $^1\text{H NMR}$  (300 MHz,  $\text{CDCl}_3$ )  $\delta$  (ppm) = 2.77 (d,  $J = 4.6$  Hz, 2H), 2.63 – 2.32 (m, 4H), 2.10 (t,  $J = 4.6$  Hz, 1H), 2.07 – 1.92 (m, 1H), 0.95 (s, 9H), 0.11 (s, 3H), 0.03 (s, 3H);  $^{13}\text{C NMR}$  (100 MHz,  $\text{CDCl}_3$ )  $\delta$  (ppm) = 188.72, 167.30, 142.90, 142.55, 37.59, 30.87, 30.21, 26.59, 25.39, 22.03, 17.62, -5.85, -6.93; Exact mass calculated for  $\text{C}_{15}\text{H}_{25}\text{O}_3\text{Si}$   $[\text{M}+\text{H}]^+$  281.1567, found 281.1574; HPLC (Chiralpak AS-H, *i*-propanol/hexane = 40/60, flow rate 1.0 mL/min,  $\lambda = 254$  nm):  $t_{\text{R}}$  (minor) = 16.4 min,  $t_{\text{R}}$  (major) = 20.5 min,  $ee = 93\%$ ;  $[\alpha]_{\text{D}}^{25} = -167.7$  ( $c = 0.91$  in DCM).

## 4. NMR Spectra of the Products

### Compound 3a

$^1\text{H}$  NMR (500 MHz,  $\text{CDCl}_3$ )

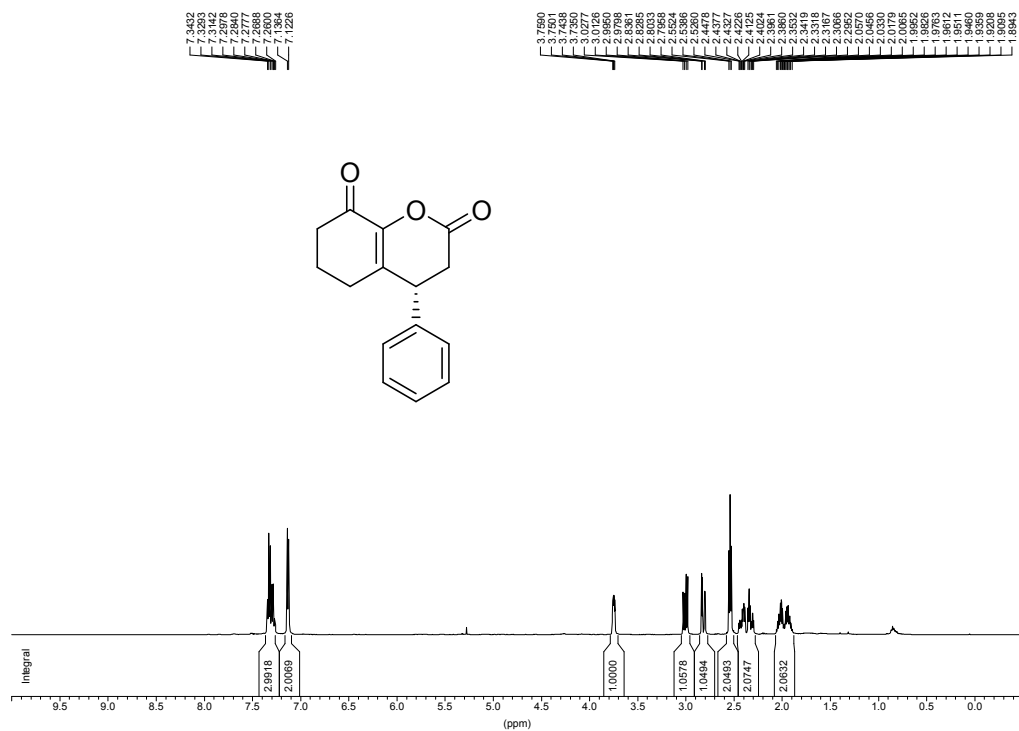

$^{13}\text{C}$  NMR (125 MHz,  $\text{CDCl}_3$ )

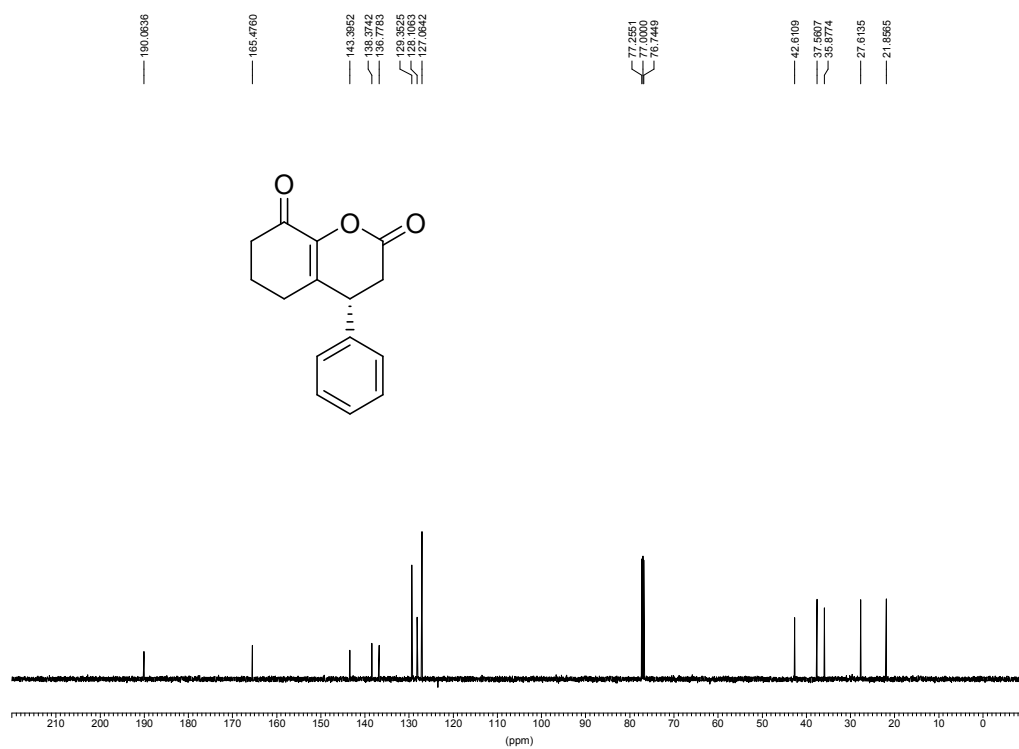

### Compound 3b

$^1\text{H}$  NMR (300 MHz,  $\text{CDCl}_3$ )

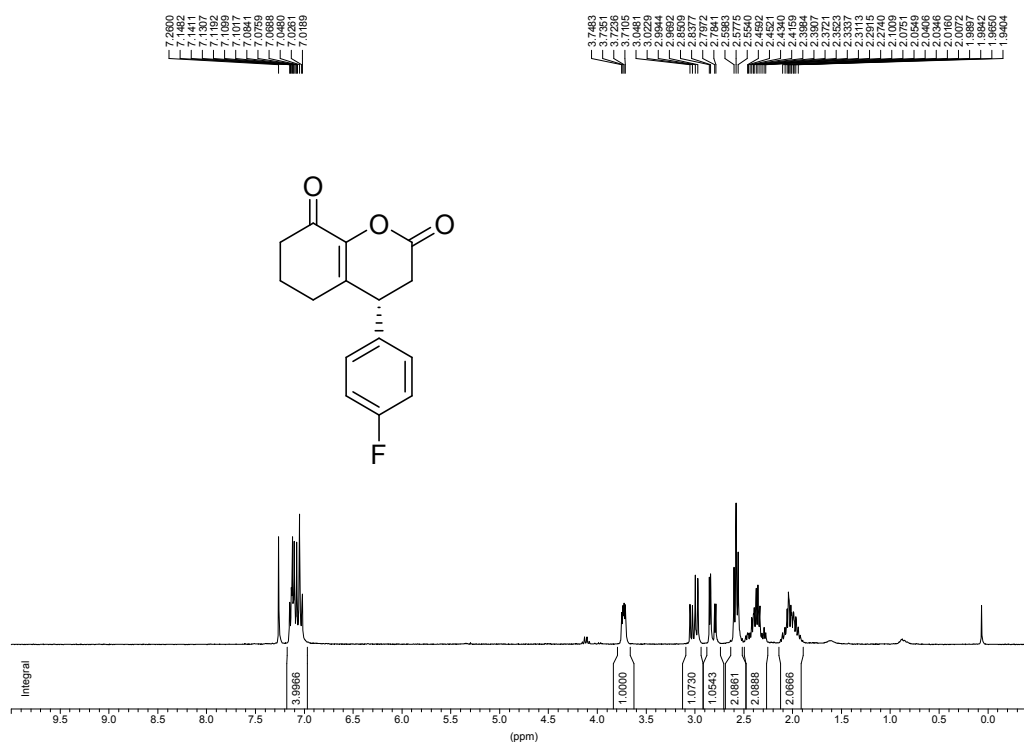

$^{13}\text{C}$  NMR (100 MHz,  $\text{CDCl}_3$ )

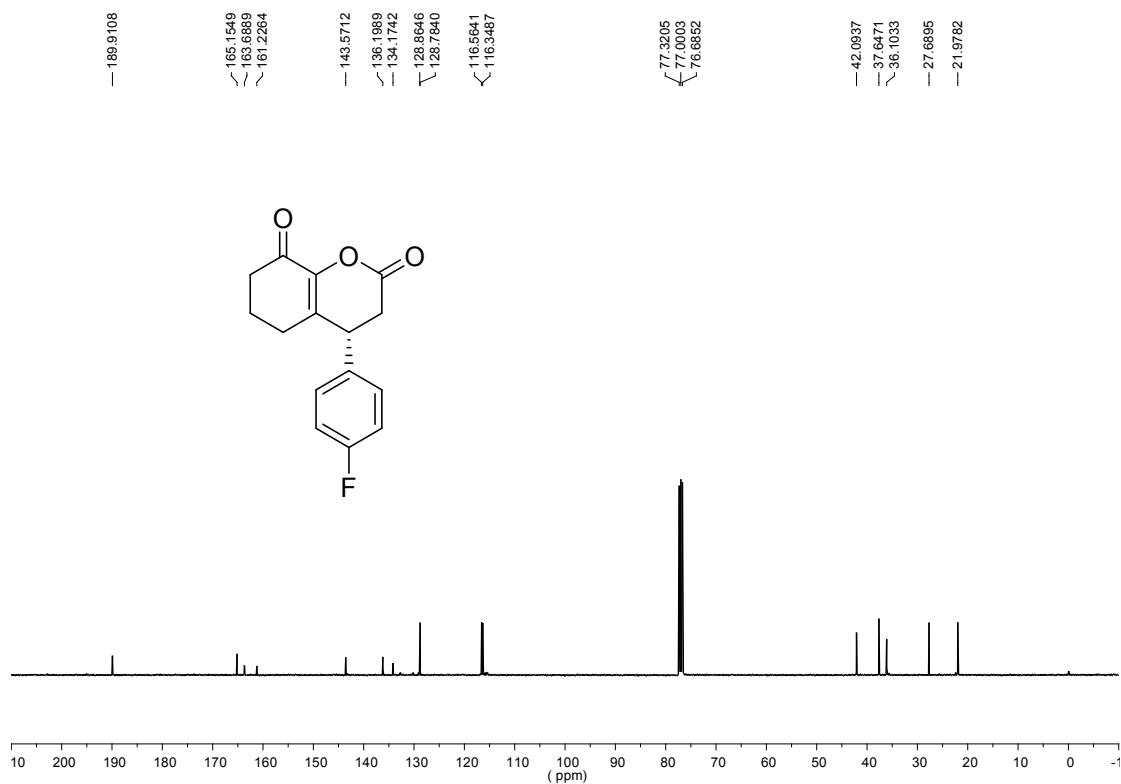

### Compound 3c

$^1\text{H}$  NMR (400 MHz,  $\text{CDCl}_3$ )

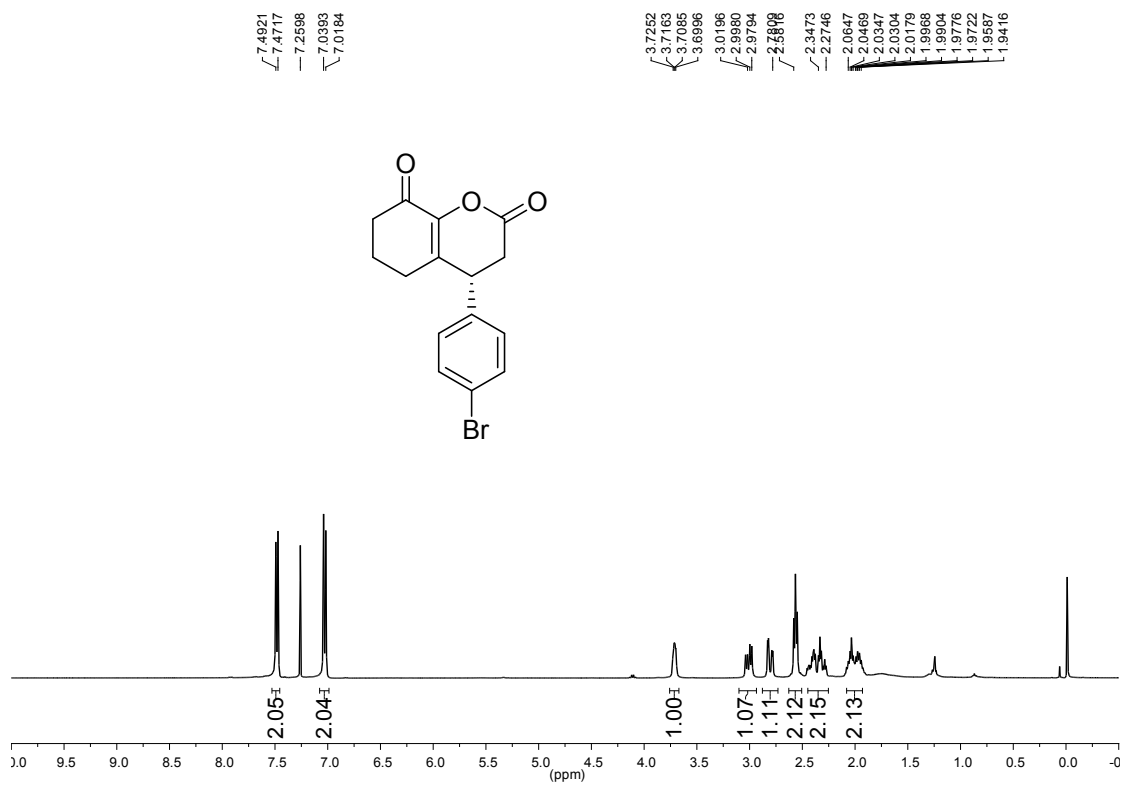

$^{13}\text{C}$  NMR (100 MHz,  $\text{CDCl}_3$ )

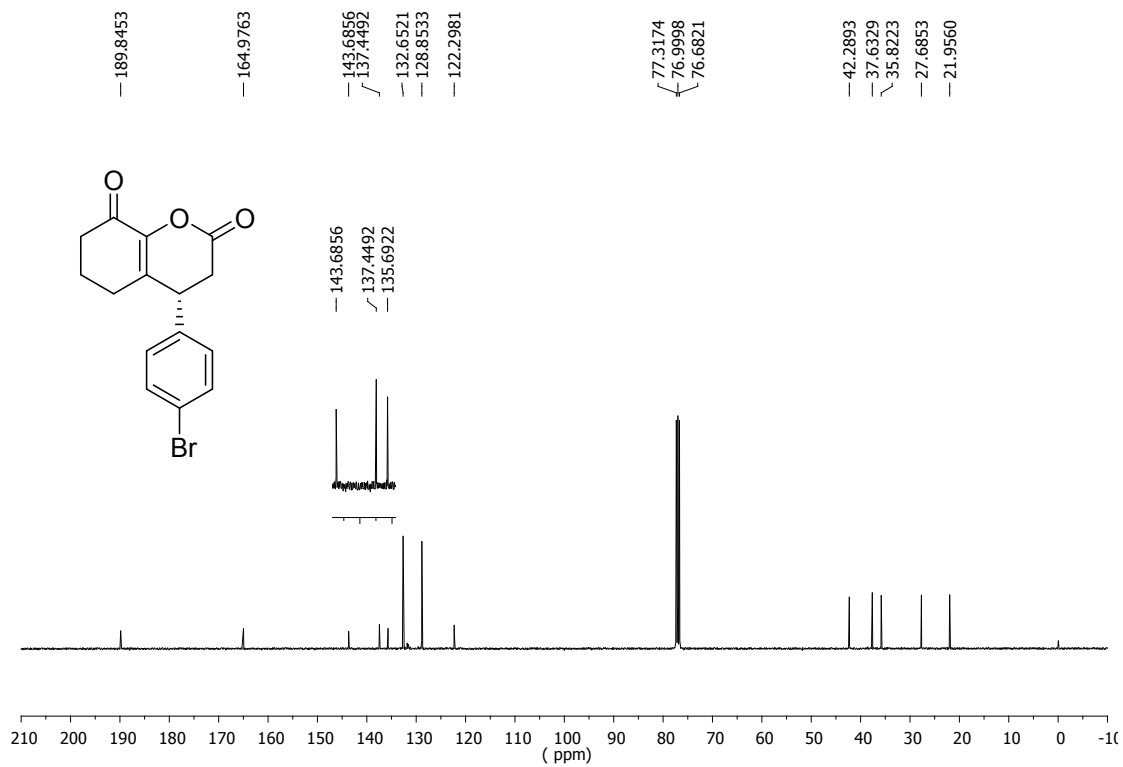

### Compound 3d

$^1\text{H}$  NMR (300 MHz,  $\text{CDCl}_3$ )

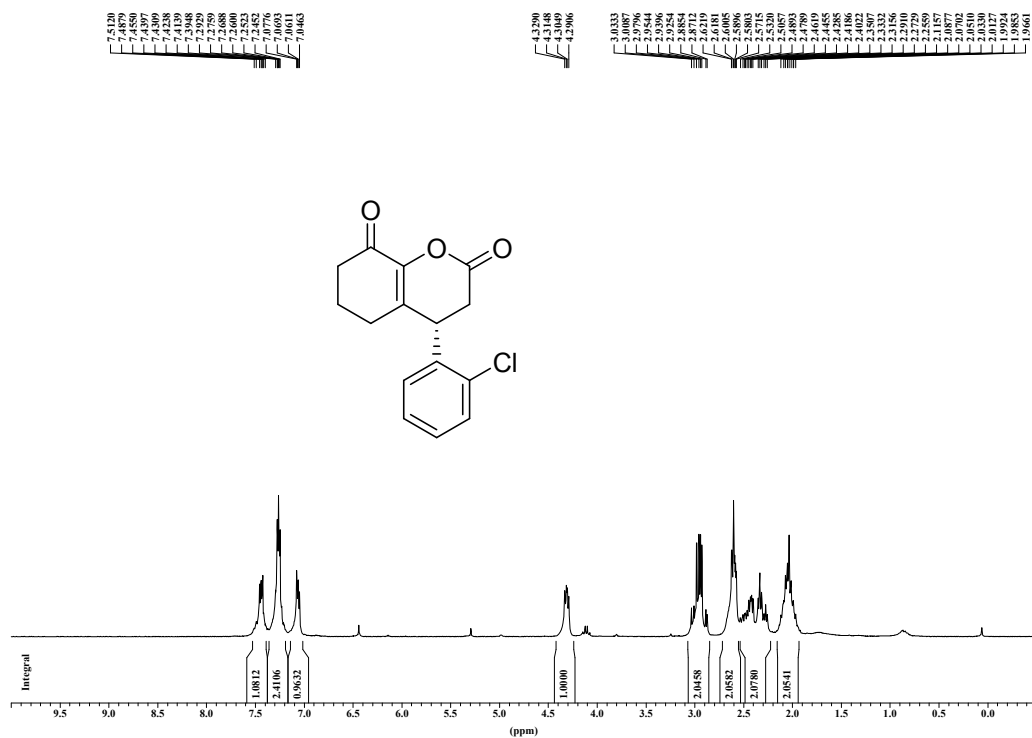

$^{13}\text{C}$  NMR (75 MHz,  $\text{CDCl}_3$ )



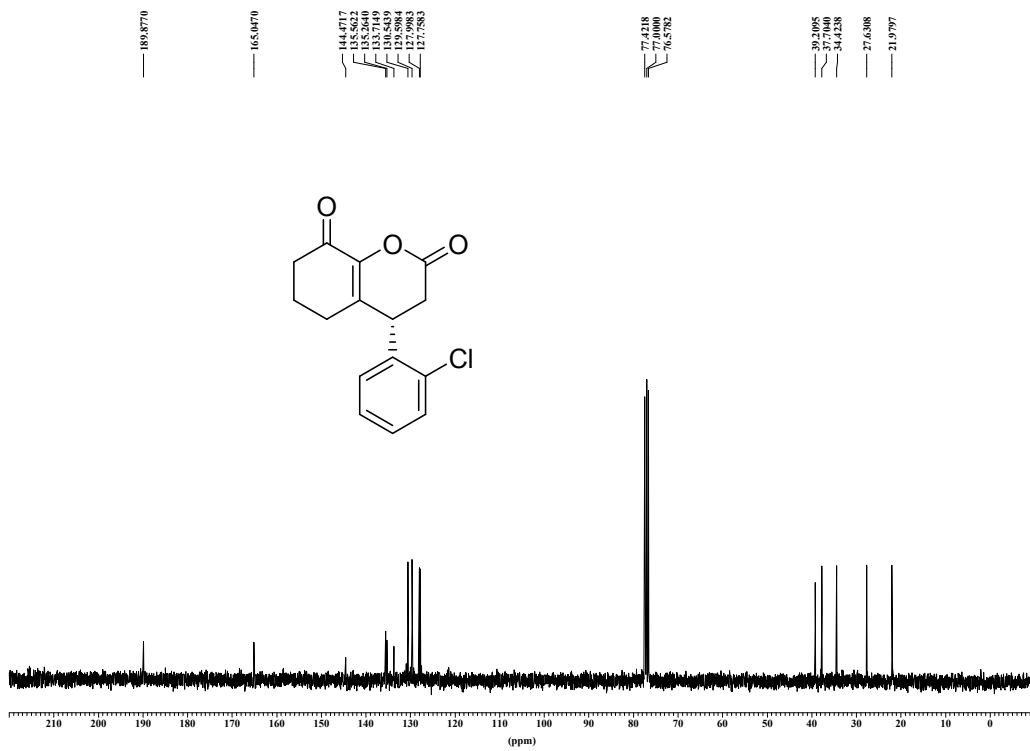

### Compound 3e

<sup>1</sup>H NMR (500 MHz, CDCl<sub>3</sub>)

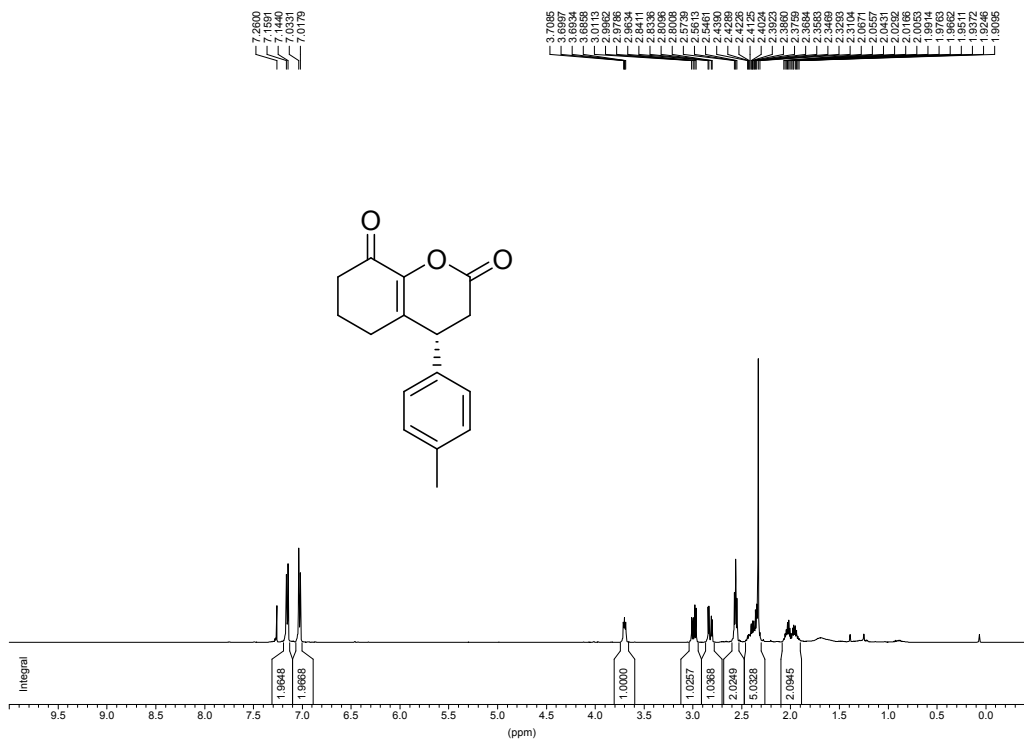

<sup>13</sup>C NMR (125 MHz, CDCl<sub>3</sub>)

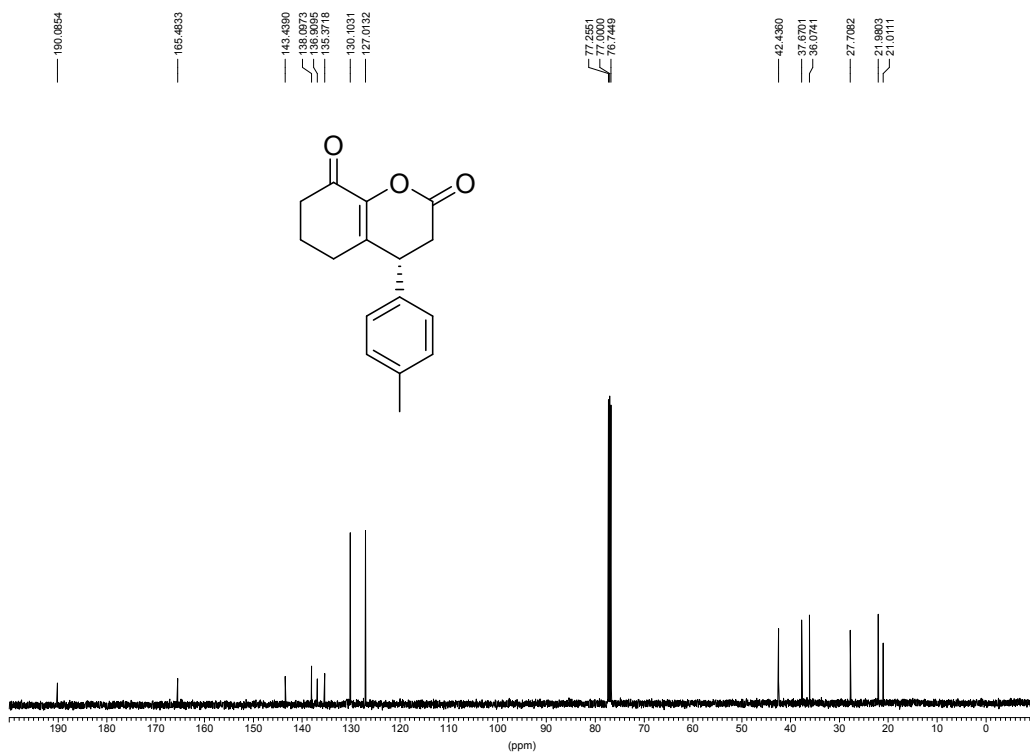

### Compound 3f

<sup>1</sup>H NMR (500 MHz, CDCl<sub>3</sub>)

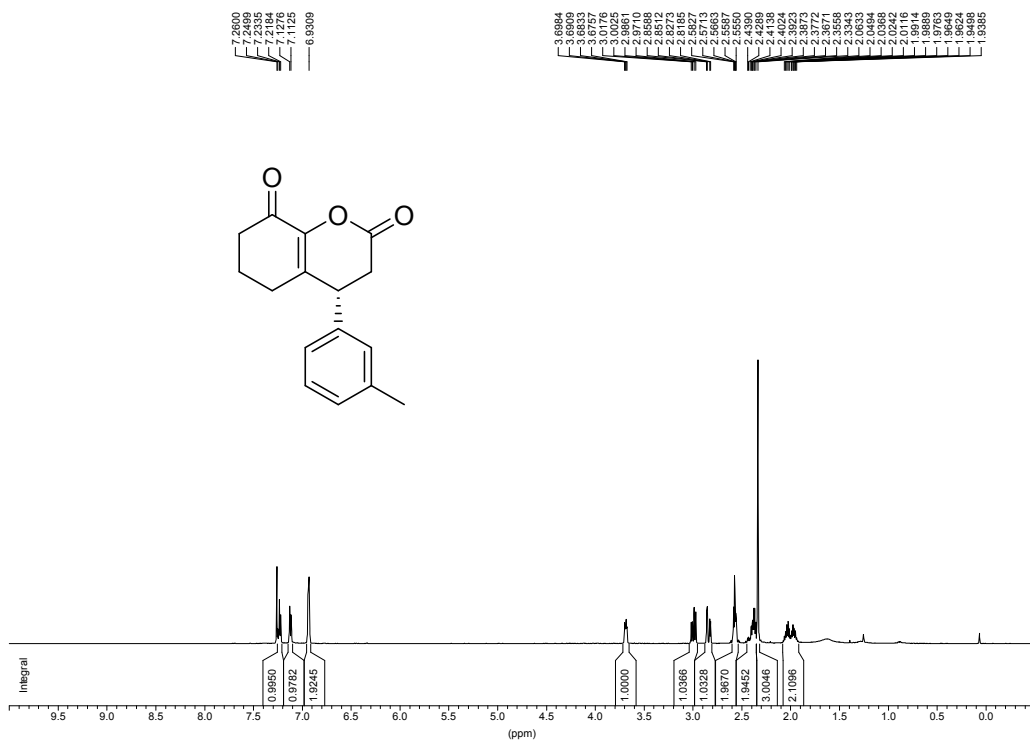

$^{13}\text{C}$  NMR (100 MHz,  $\text{CDCl}_3$ )

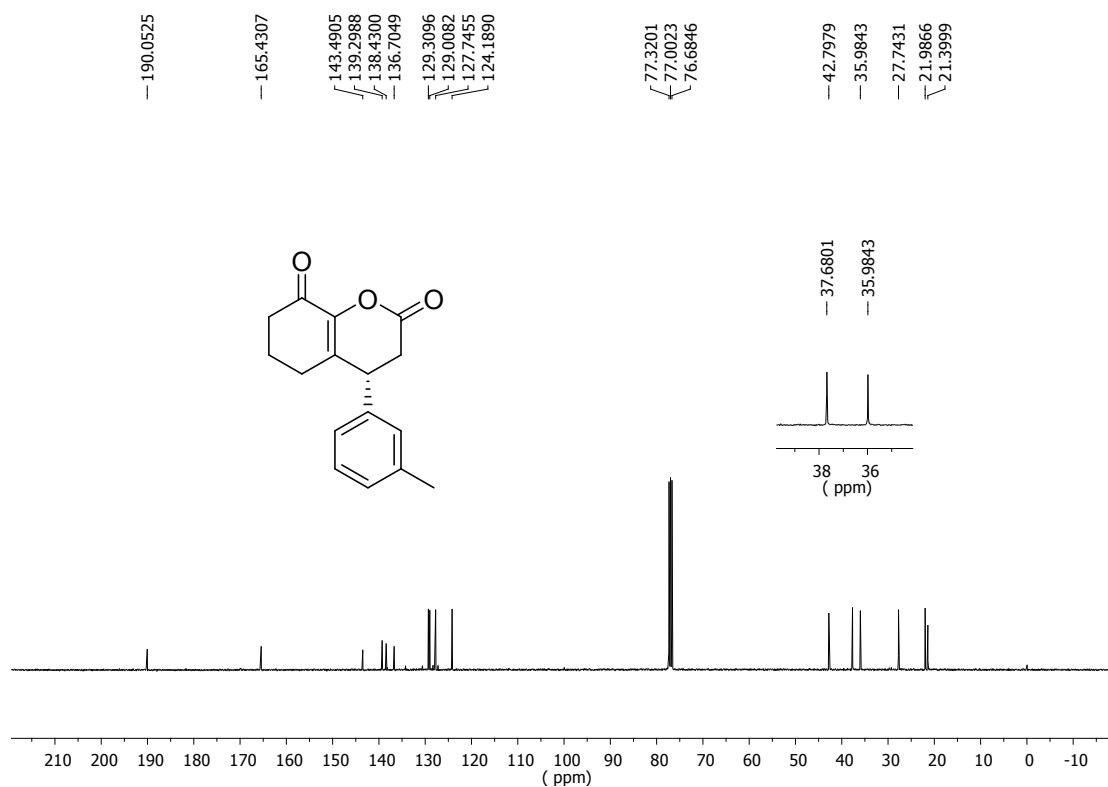

**Compound 3g**

$^1\text{H}$  NMR (500 MHz,  $\text{CDCl}_3$ )

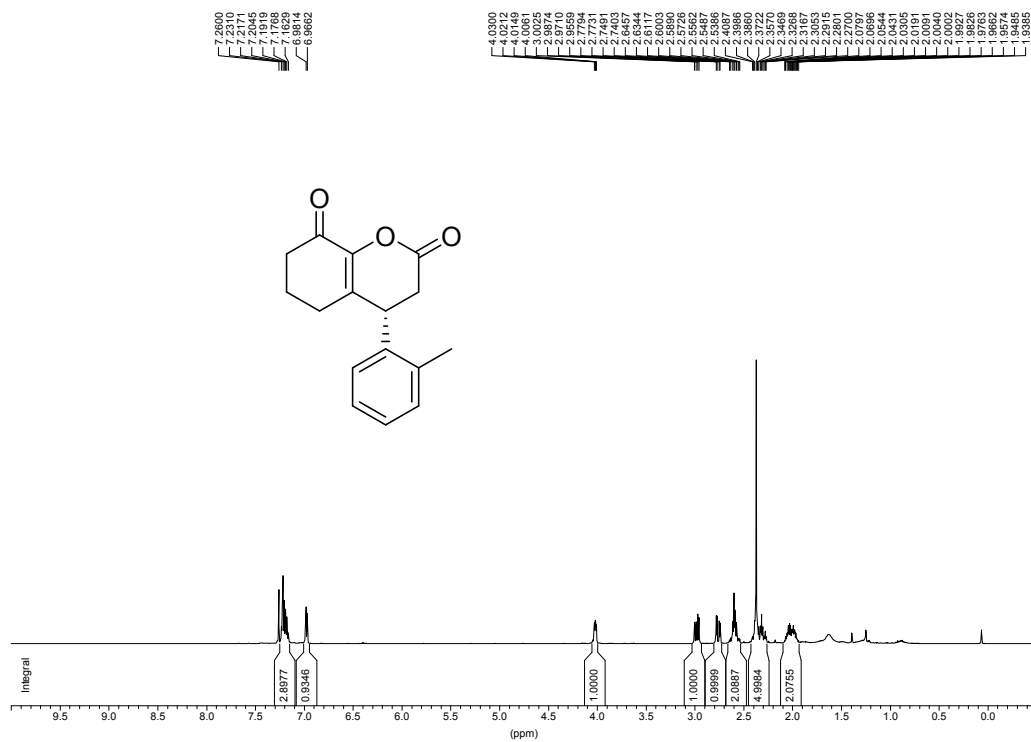

$^{13}\text{C}$  NMR (100 MHz,  $\text{CDCl}_3$ )

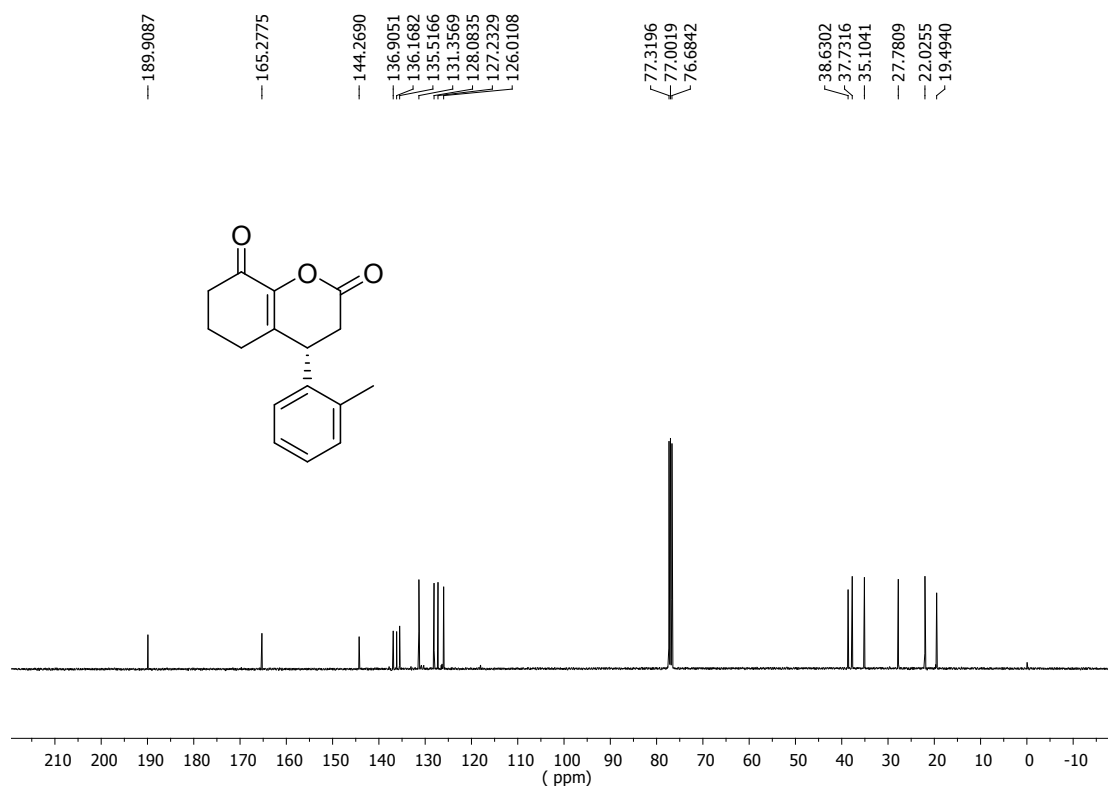

### Compound 3h

$^1\text{H}$  NMR (300 MHz,  $\text{CDCl}_3$ )

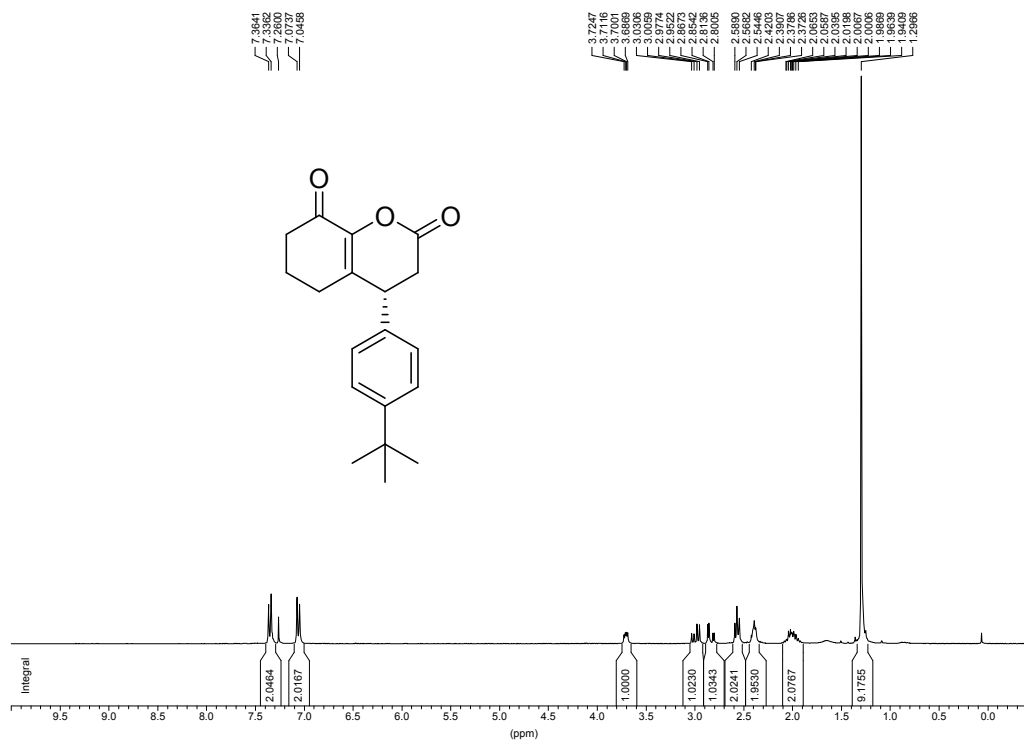

$^{13}\text{C}$  NMR (75 MHz,  $\text{CDCl}_3$ )

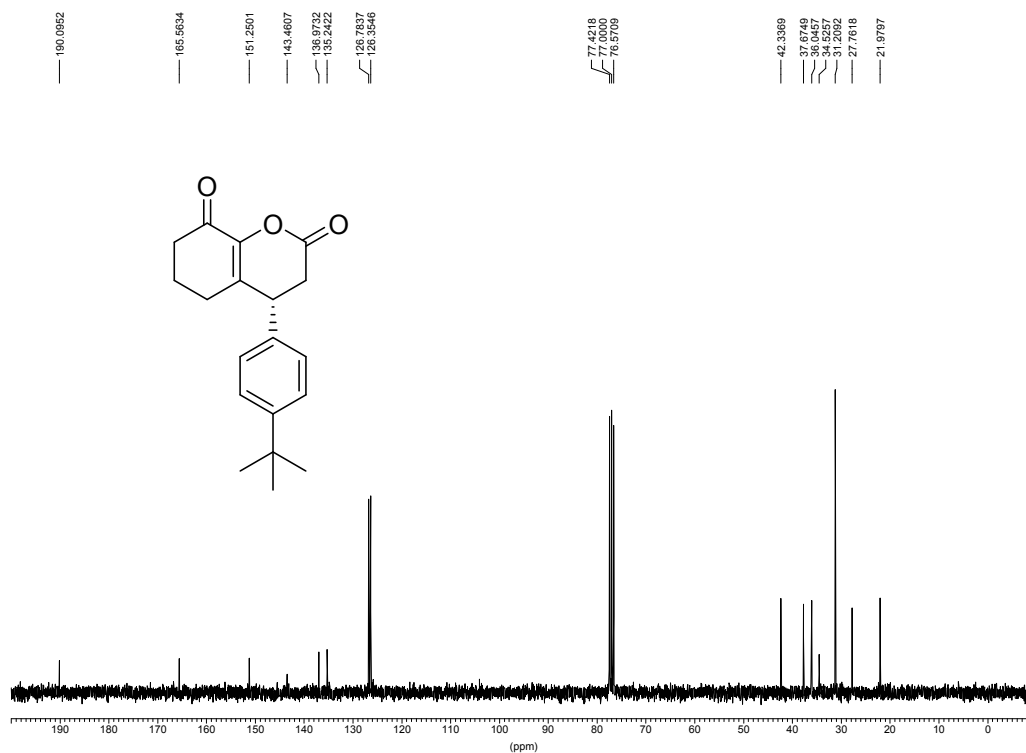

**Compound 3i**

$^1\text{H}$  NMR (300 MHz,  $\text{CDCl}_3$ )

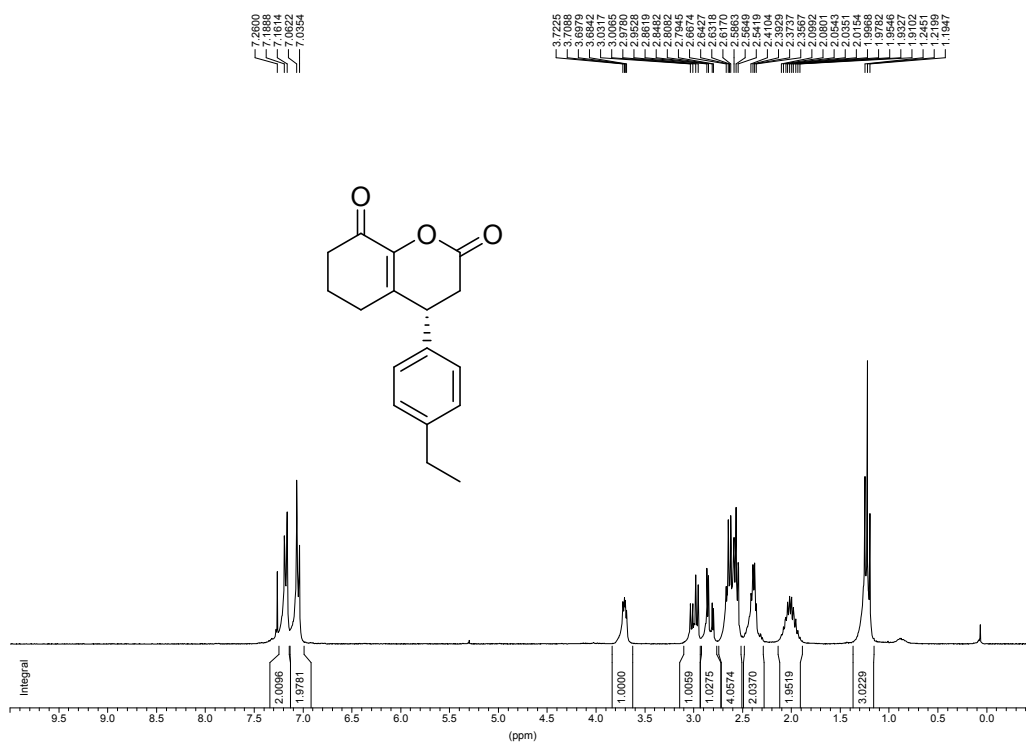

$^{13}\text{C}$  NMR (100 MHz,  $\text{CDCl}_3$ )

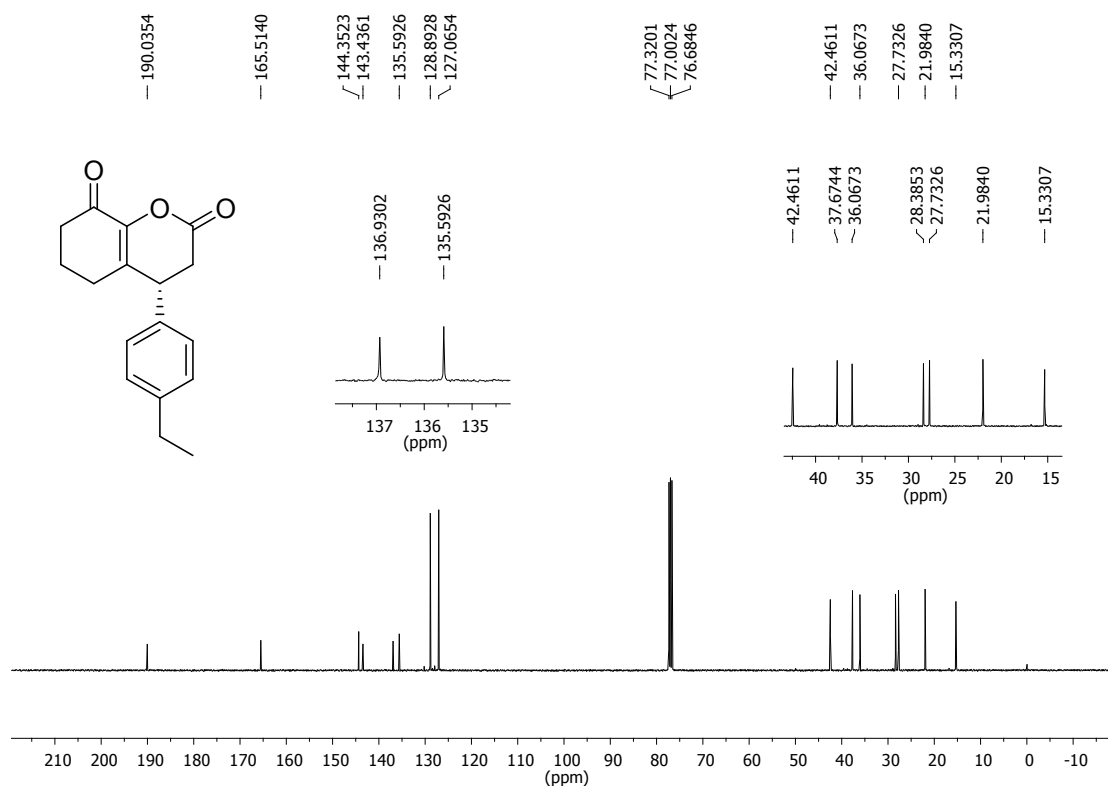

### Compound 3j

$^1\text{H}$  NMR (300 MHz,  $\text{CDCl}_3$ )

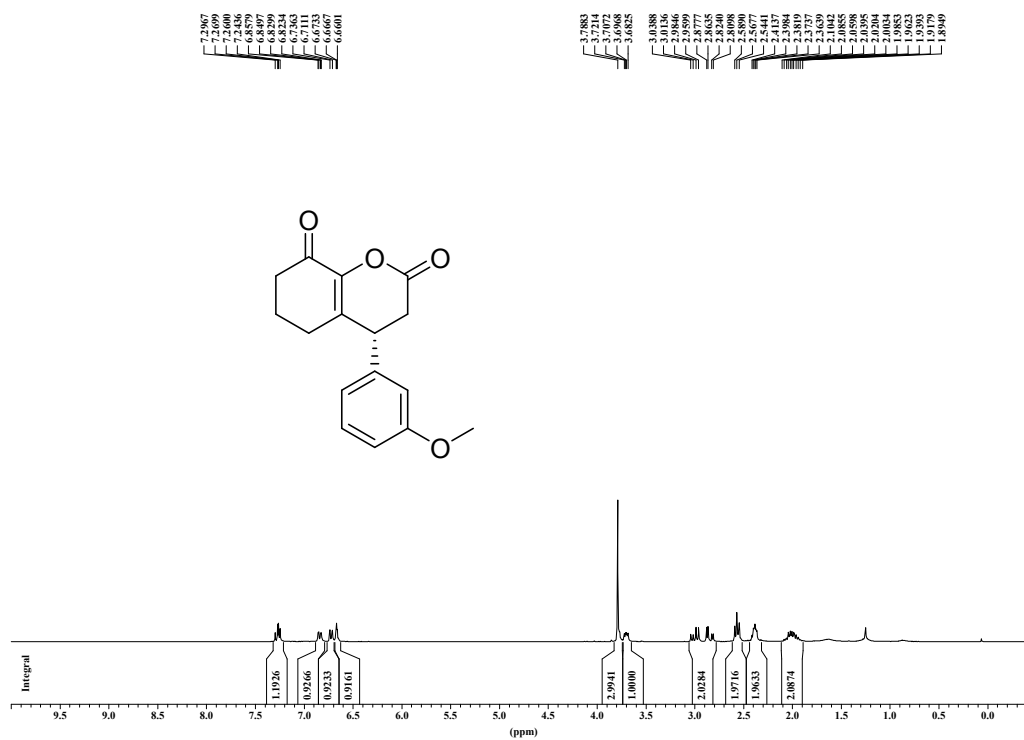

$^{13}\text{C}$  NMR (75 MHz,  $\text{CDCl}_3$ )

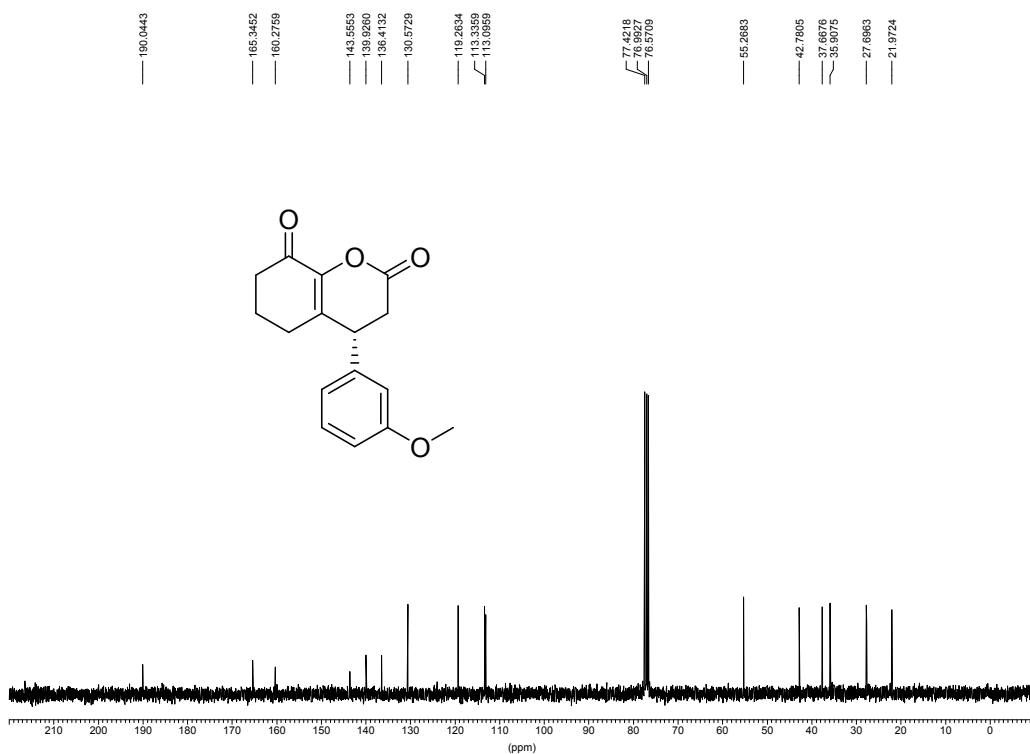

### Compound 3k

<sup>1</sup>H NMR (300 MHz, CDCl<sub>3</sub>)

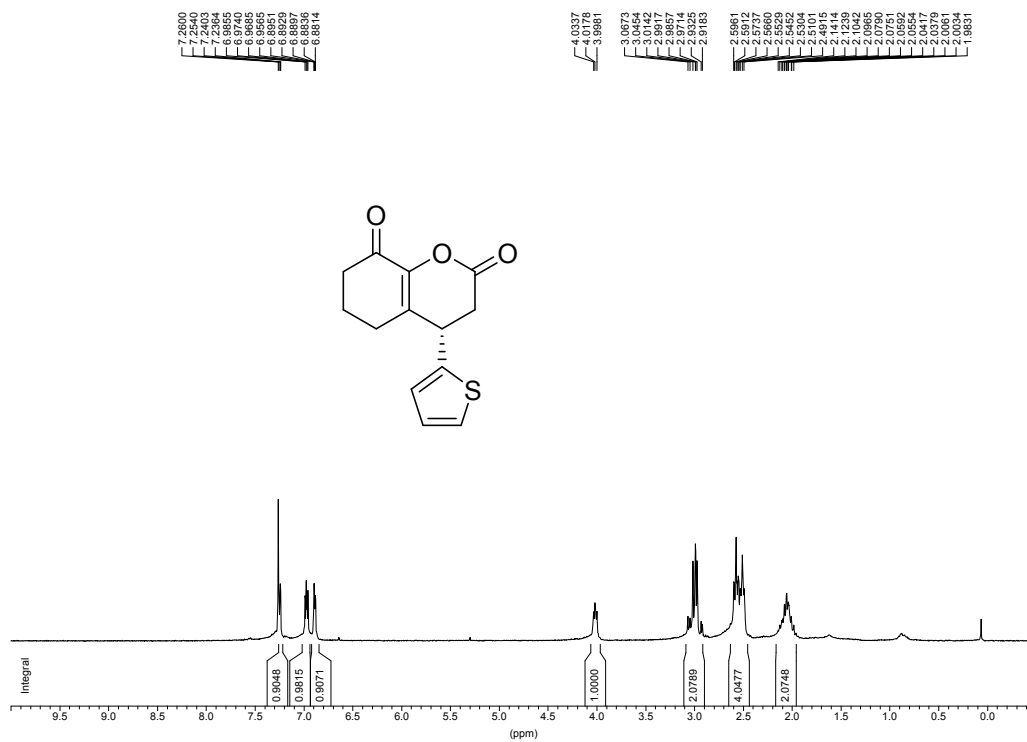

$^{13}\text{C}$  NMR (75 MHz,  $\text{CDCl}_3$ )

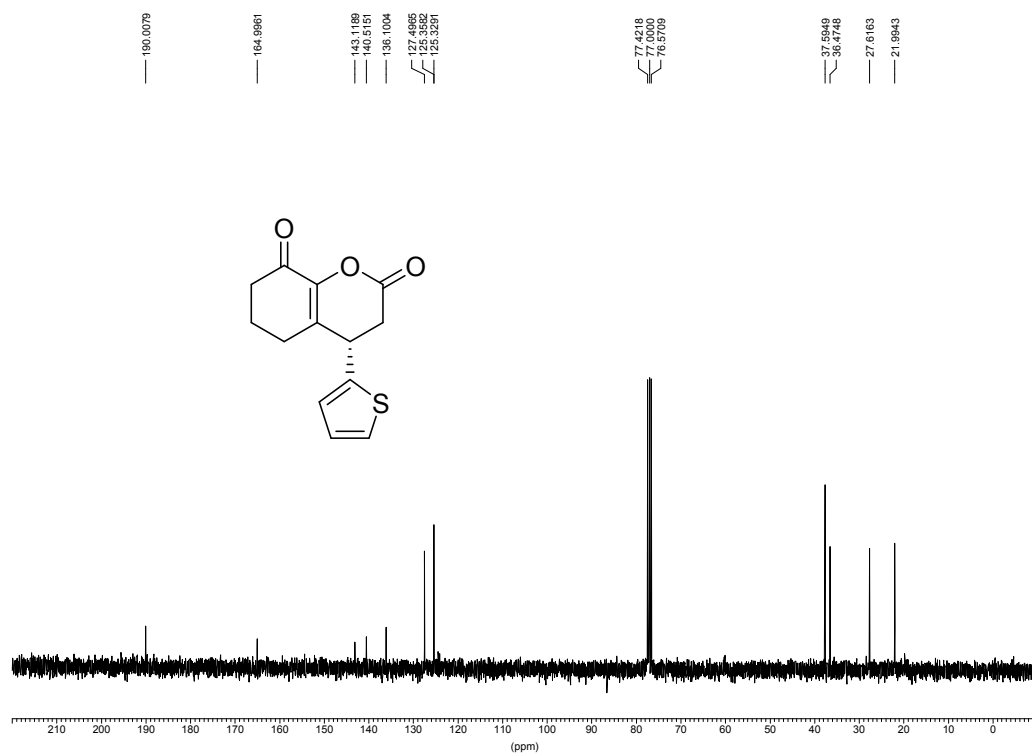

### Compound 31

$^1\text{H}$  NMR (500 MHz,  $\text{CDCl}_3$ )



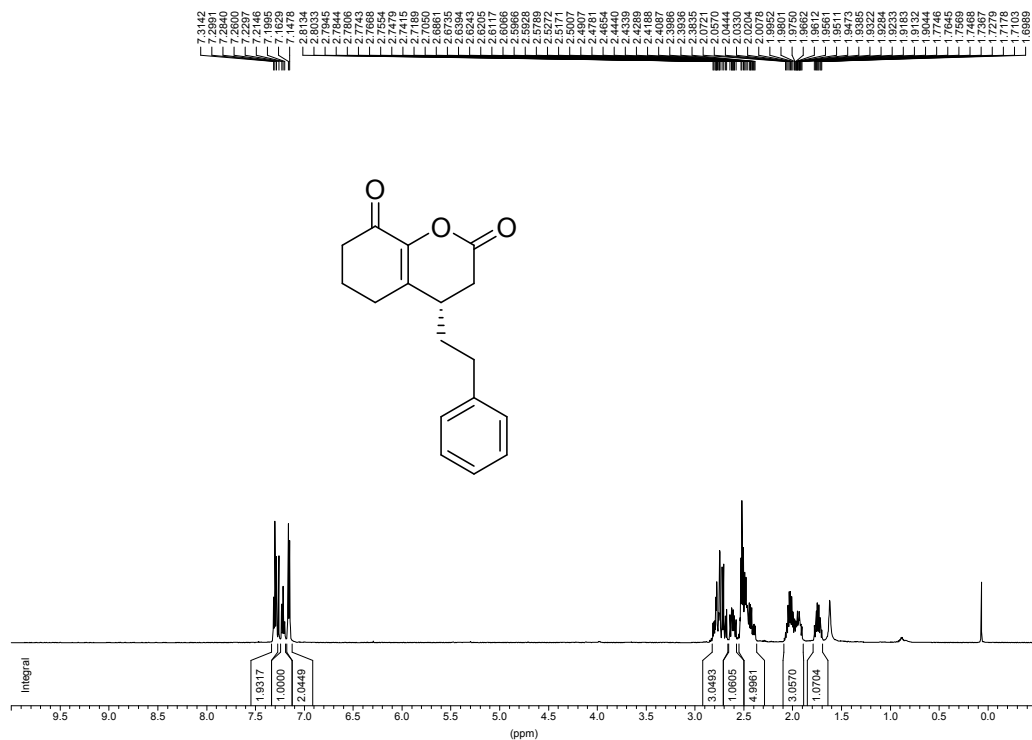

<sup>13</sup>C NMR (100 MHz, CDCl<sub>3</sub>)

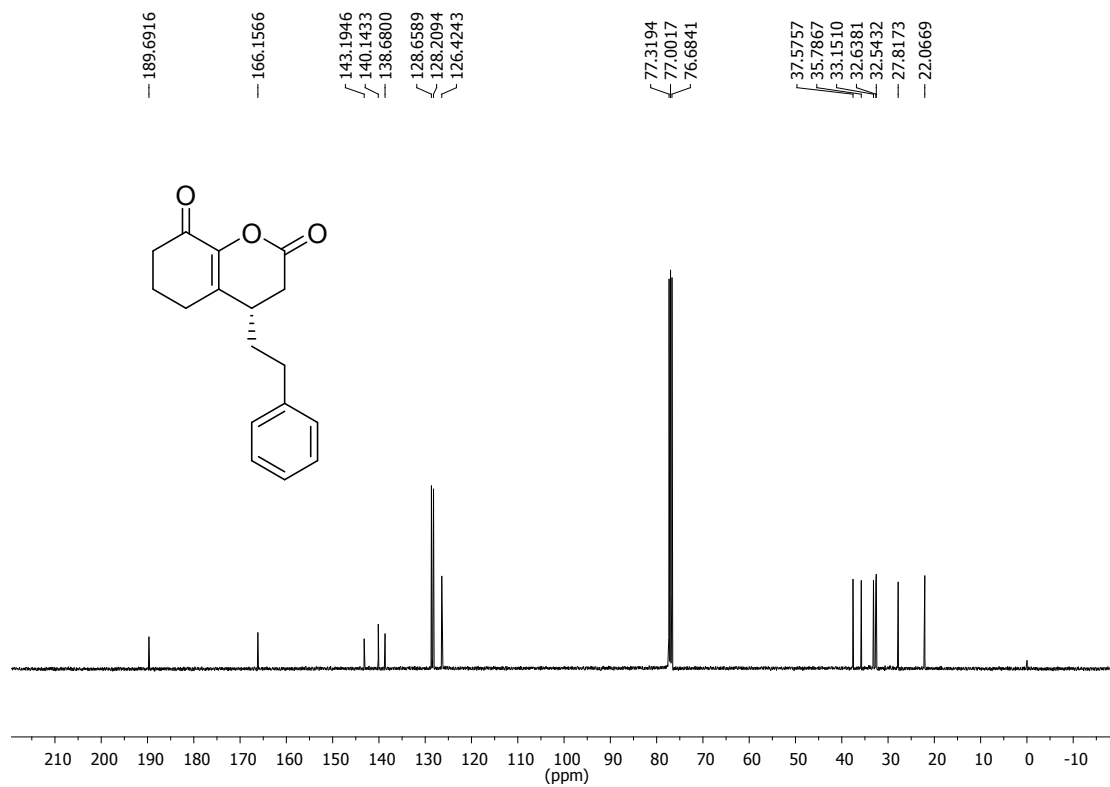

**Compound 3m**

<sup>1</sup>H NMR (300 MHz, CDCl<sub>3</sub>)

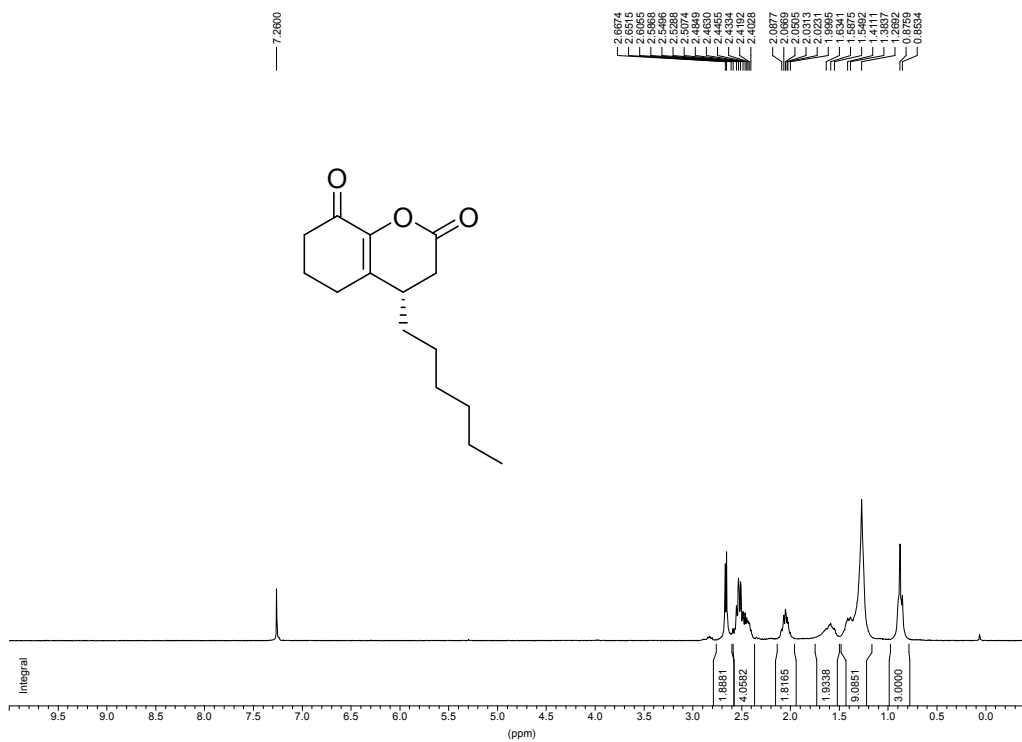

<sup>13</sup>C NMR (75 MHz, CDCl<sub>3</sub>)

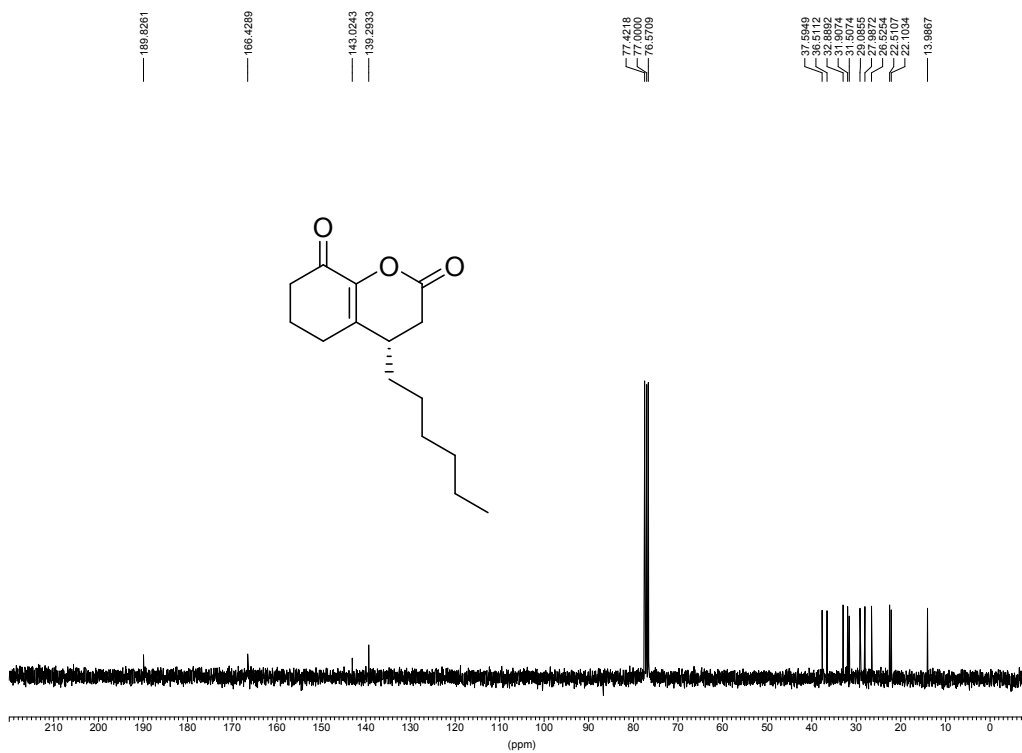

**Compound 3n**

<sup>1</sup>H NMR (500 MHz, CDCl<sub>3</sub>)

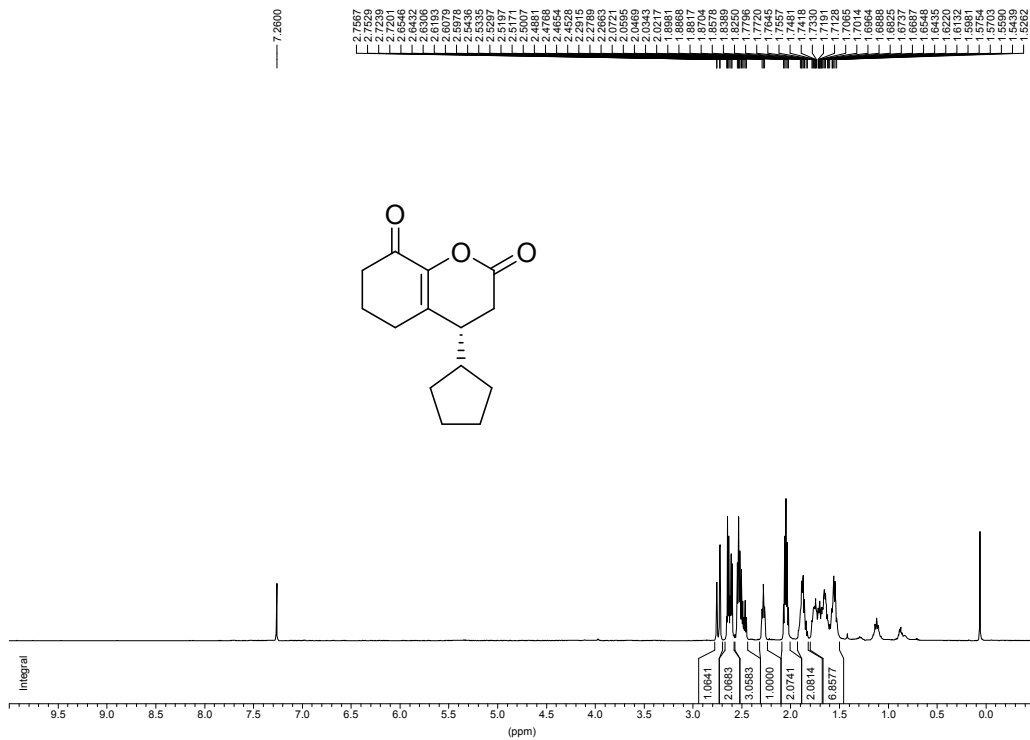

<sup>13</sup>C NMR (100 MHz, CDCl<sub>3</sub>)

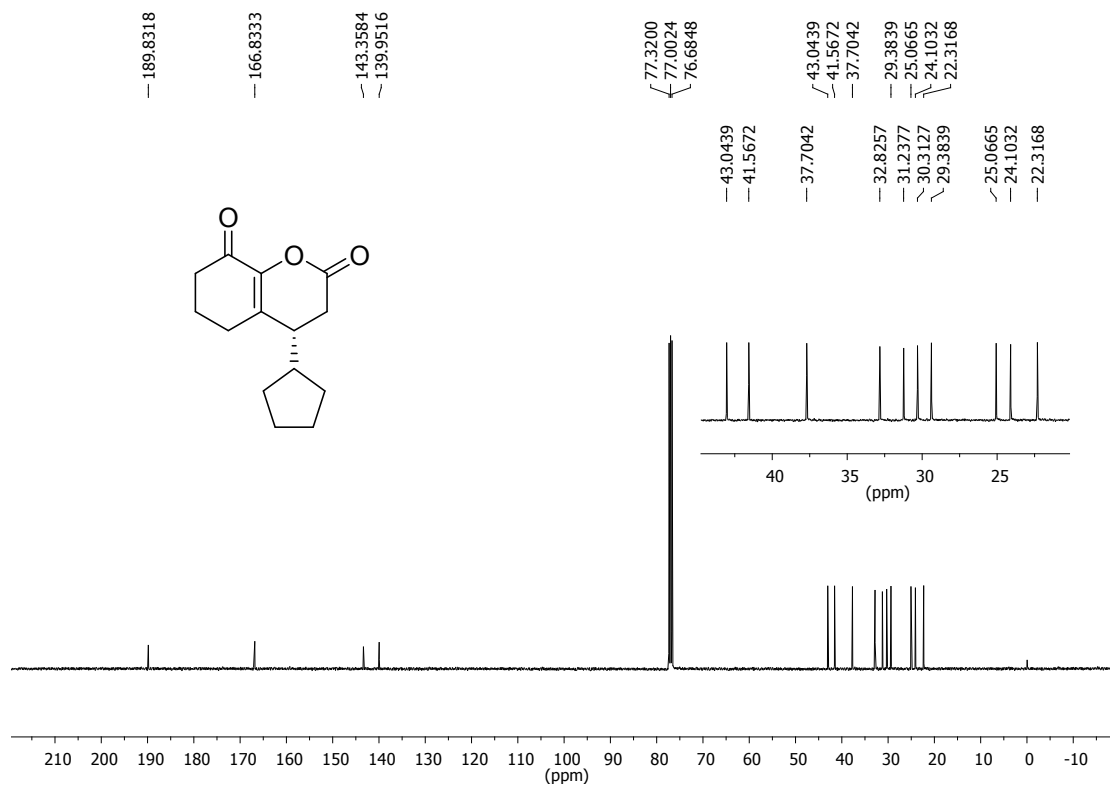

**Compound 3o**

<sup>1</sup>H NMR (300 MHz, CDCl<sub>3</sub>)

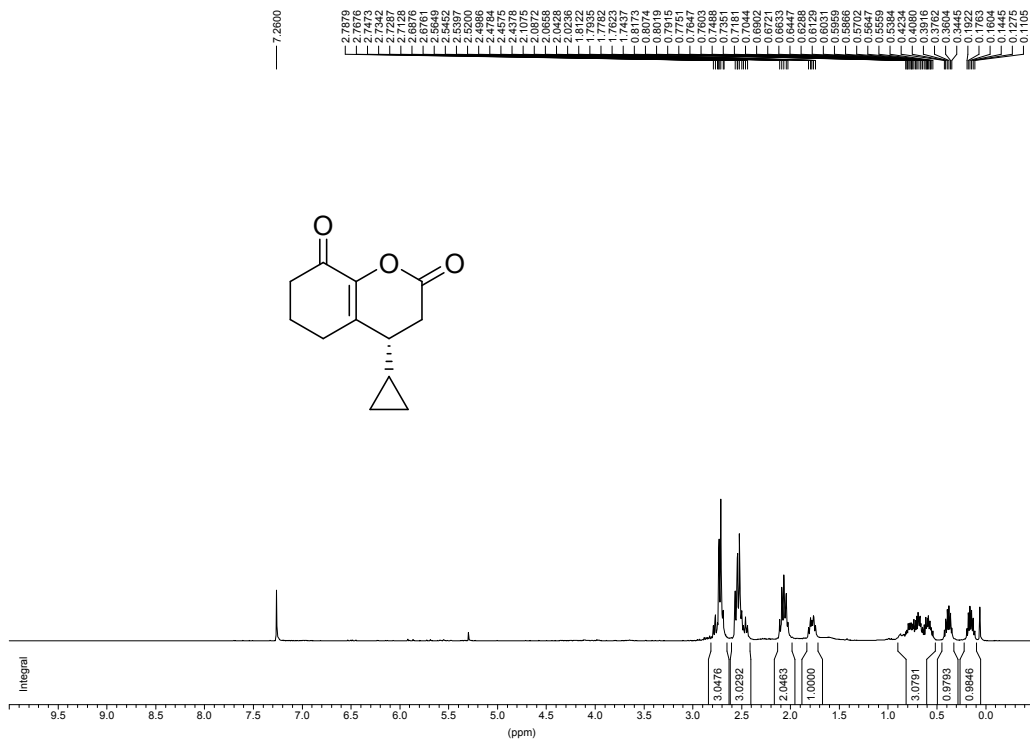

<sup>13</sup>C NMR (75 MHz, CDCl<sub>3</sub>)

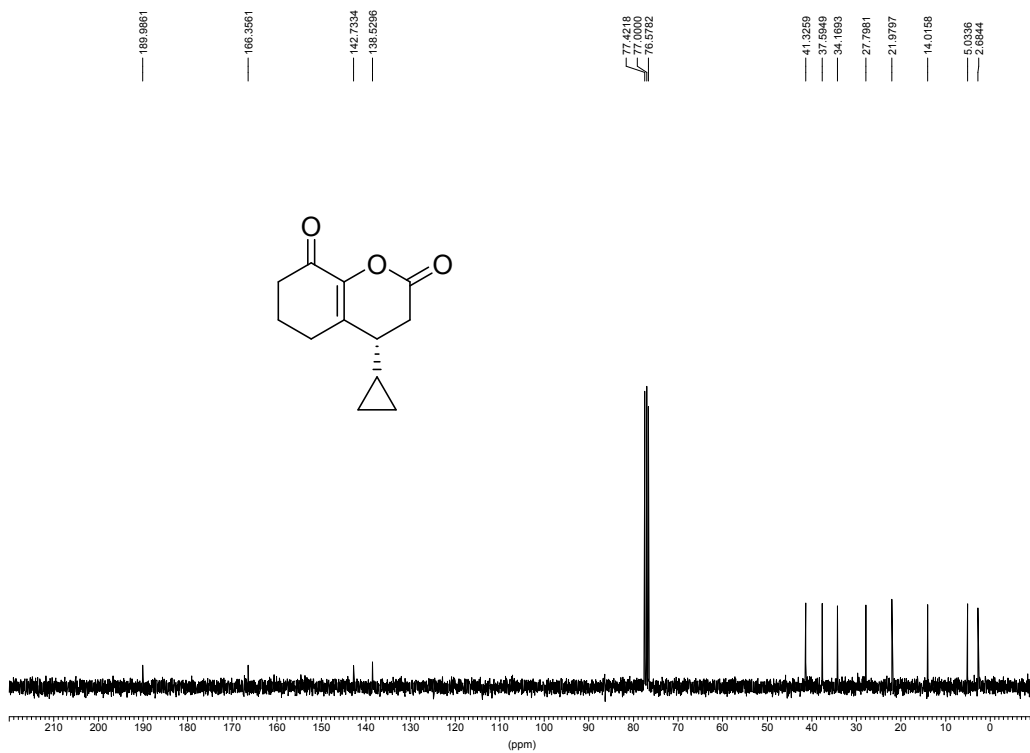

**Compound 3p**

<sup>1</sup>H NMR (300 MHz, CDCl<sub>3</sub>)

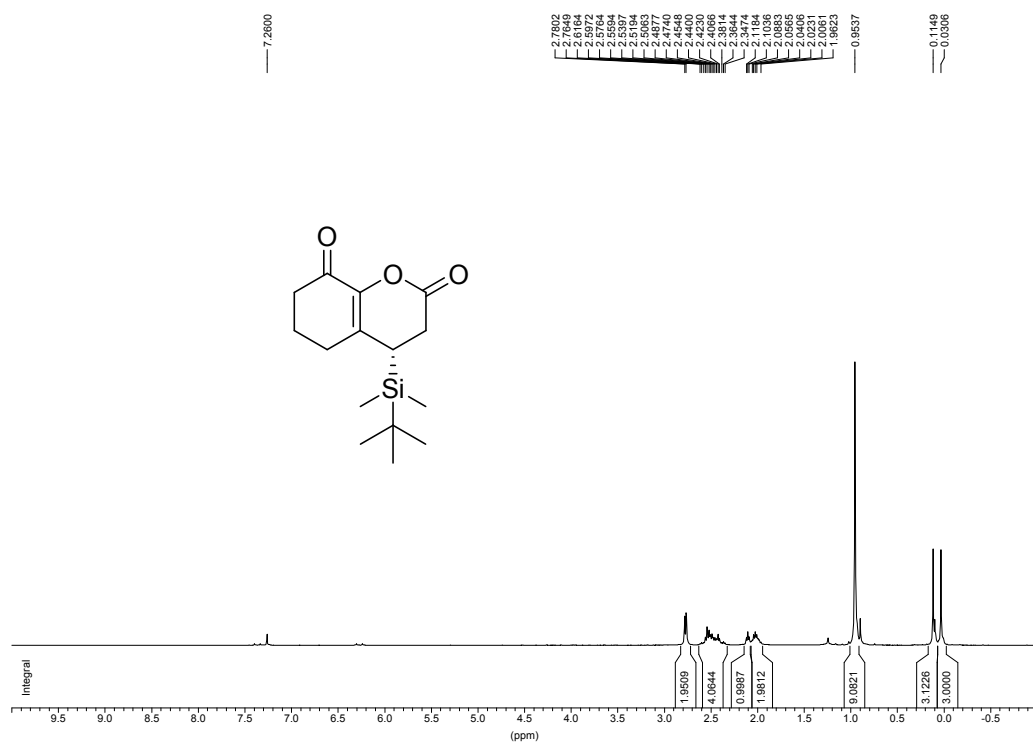

<sup>13</sup>C NMR (100 MHz, CDCl<sub>3</sub>)

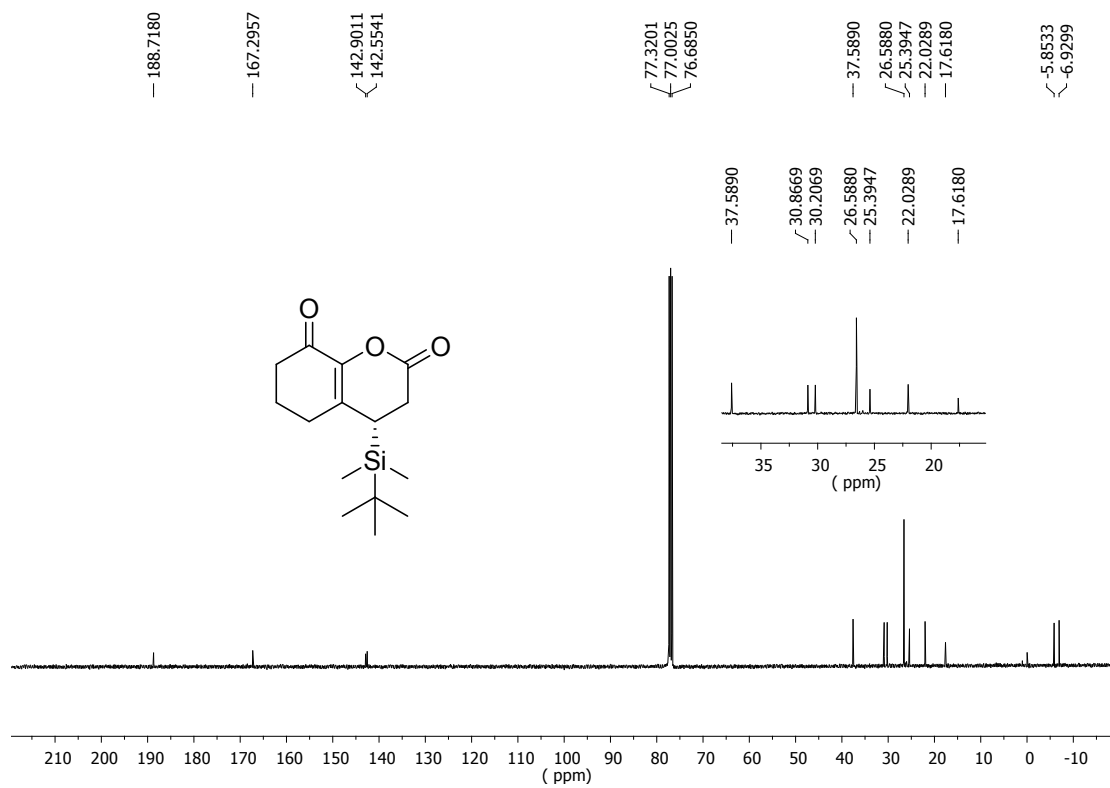

## 5. HPLC Chromatogram Profile of the Products

### Racemic 3a

## ==== Shimadzu LCsolution Analysis Report ====

C:\Users\User\Desktop\LC data\Ren Qiao\rq845.lcd

Acquired by : Admin

Sample Name : RQF045-3

Sample ID : RQ

Data File Name : rq845.lcd

Method File Name : 40%IPA, 1ml-min, 40min.lcm

Batch File Name :

Report File Name : Default.lcr

Description : AS-H column with IC guard column ;40%IPA ;1 ml/min

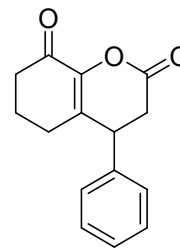

Chromatogram  
RQF045-3 C:\Users\User\Desktop\LC data\Ren Qiao\rq845.lcd

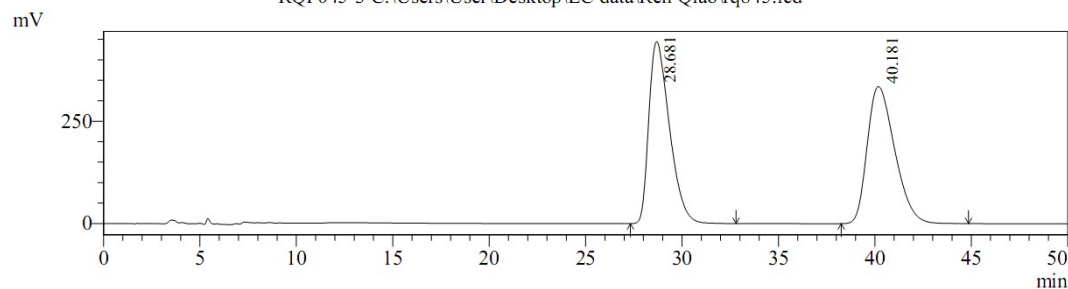

Detector A Ch1 254nm

| Peak# | Ret. Time | Area     | Height | Area %  | Height % |
|-------|-----------|----------|--------|---------|----------|
| 1     | 28.681    | 33085665 | 444541 | 49.892  | 57.032   |
| 2     | 40.181    | 33228396 | 334922 | 50.108  | 42.968   |
| Total |           | 66314061 | 779463 | 100.000 | 100.000  |

### Enantiomeric enriched 3a

## ==== Shimadzu LCsolution Analysis Report ====

C:\Users\User\Desktop\LC data\Ren Qiao\rq857.lcd

Acquired by : Admin

Sample Name : RQF056-3

Sample ID : RQ

Data File Name : rq857.lcd

Method File Name : 40%IPA, 1ml-min, 40min.lcm

Batch File Name :

Report File Name : Default.lcr

Description : AS-H column with IC guard column ;40%IPA ;1 ml/min

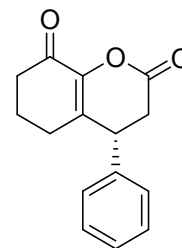

Chromatogram  
RQF056-3 C:\Users\User\Desktop\LC data\Ren Qiao\rq857.lcd

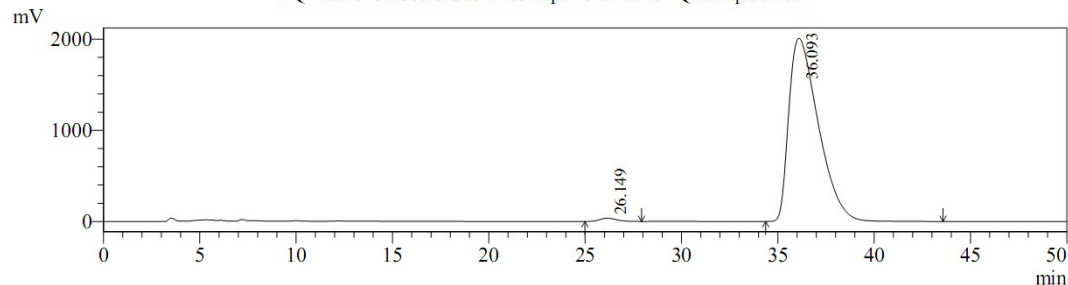

Detector A Ch1 254nm

| Peak# | Ret. Time | Area      | Height  | Area %  | Height % |
|-------|-----------|-----------|---------|---------|----------|
| 1     | 26.149    | 2125304   | 36056   | 0.984   | 1.762    |
| 2     | 36.093    | 213953460 | 2009794 | 99.016  | 98.238   |
| Total |           | 216078764 | 2045850 | 100.000 | 100.000  |

### Racemic 3b

# ==== Shimadzu LCsolution Analysis Report ====

C:\Users\User\Desktop\LC data\Ren Qiao\rq874.lcd

Acquired by : Admin

Sample Name : RQF069

Sample ID : RQ

Data File Name : rq874.lcd

Method File Name : 40%IPA, 1ml-min, 40min.lcm

Batch File Name :

Report File Name : Default.lcr

Description : AS-H column with IC guard column ;40%IPA ;1 ml/min

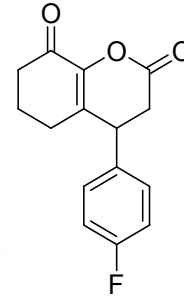

Chromatogram

RQF069 C:\Users\User\Desktop\LC data\Ren Qiao\rq874.lcd

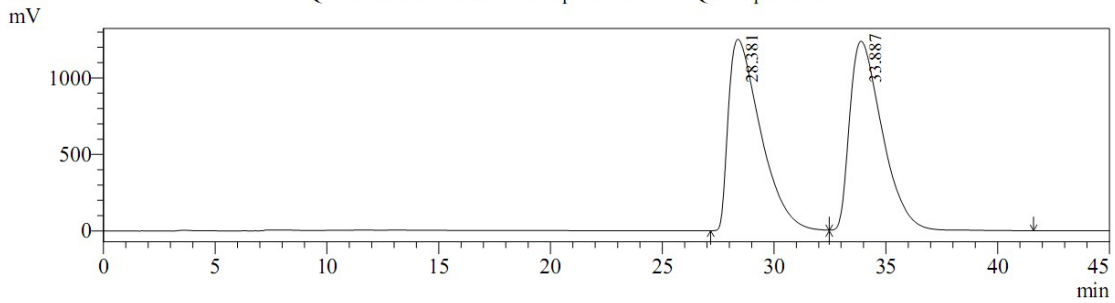

Detector A Ch1 254nm

| Peak# | Ret. Time | Area      | Height  | Area %  | Height % |
|-------|-----------|-----------|---------|---------|----------|
| 1     | 28.381    | 125176838 | 1251224 | 49.921  | 50.257   |
| 2     | 33.887    | 125575227 | 1238434 | 50.079  | 49.743   |
| Total |           | 250752066 | 2489658 | 100.000 | 100.000  |

Enantiomeric enriched 3b

# ==== Shimadzu LCsolution Analysis Report ====

C:\Users\User\Desktop\LC data\Ren Qiao\rq875.lcd

Acquired by : Admin

Sample Name : RQF070

Sample ID : RQ

Data File Name : rq875.lcd

Method File Name : 40%IPA, 1ml-min, 40min.lcm

Batch File Name :

Report File Name : Default.lcr

Description : AS-H column with IC guard column ;40%IPA ;1 ml/min

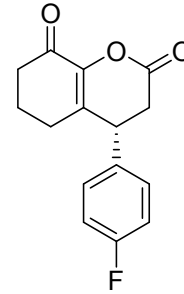

Chromatogram

RQF070 C:\Users\User\Desktop\LC data\Ren Qiao\rq875.lcd

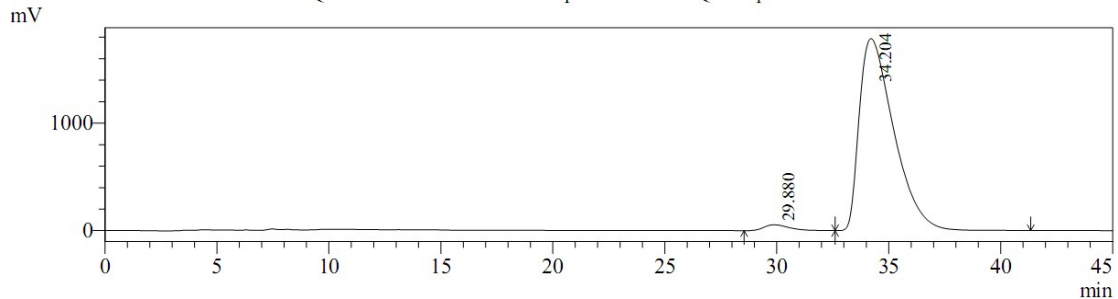

Detector A Ch1 254nm

| Peak# | Ret. Time | Area      | Height  | Area %  | Height % |
|-------|-----------|-----------|---------|---------|----------|
| 1     | 29.880    | 4336622   | 54784   | 2.216   | 2.974    |
| 2     | 34.204    | 191341258 | 1787298 | 97.784  | 97.026   |
| Total |           | 195677880 | 1842082 | 100.000 | 100.000  |

Racemic 3c

## ==== Shimadzu LCsolution Analysis Report ====

C:\Users\User\Desktop\LC data\Ren Qiao\rq892.lcd  
 Acquired by : Admin  
 Sample Name : RQF101  
 Sample ID : RQ  
 Data File Name : rq892.lcd  
 Method File Name : 40%IPA, 1ml-min, 40min.lcm  
 Batch File Name :  
 Report File Name : Default.lcr  
 Description : AS-H column with IC guard column ;40%IPA ;1 ml/min

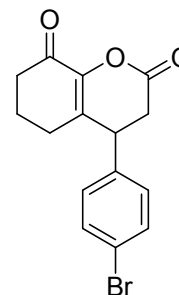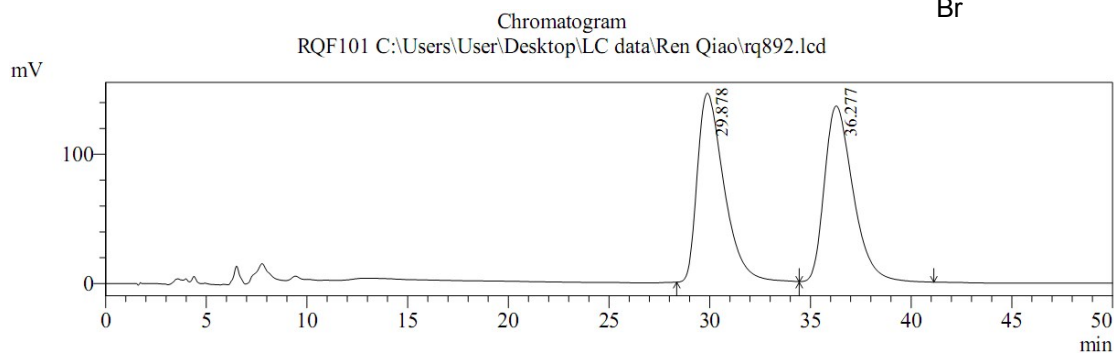

Detector A Ch1 254nm

| Peak# | Ret. Time | Area     | Height | Area %  | Height % |
|-------|-----------|----------|--------|---------|----------|
| 1     | 29.878    | 13530407 | 146140 | 49.990  | 51.737   |
| 2     | 36.277    | 13535831 | 136326 | 50.010  | 48.263   |
| Total |           | 27066238 | 282467 | 100.000 | 100.000  |

**Enantiomeric enriched 3c**

## ==== Shimadzu LCsolution Analysis Report ====

C:\Users\User\Desktop\LC data\Ren Qiao\rq893.lcd  
 Acquired by : Admin  
 Sample Name : RQF102  
 Sample ID : RQ  
 Data File Name : rq893.lcd  
 Method File Name : 40%IPA, 1ml-min, 40min.lcm  
 Batch File Name :  
 Report File Name : Default.lcr  
 Description : AS-H column with IC guard column ;40%IPA ;1 ml/min

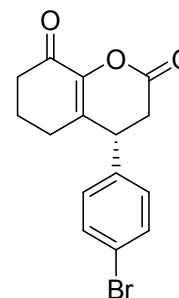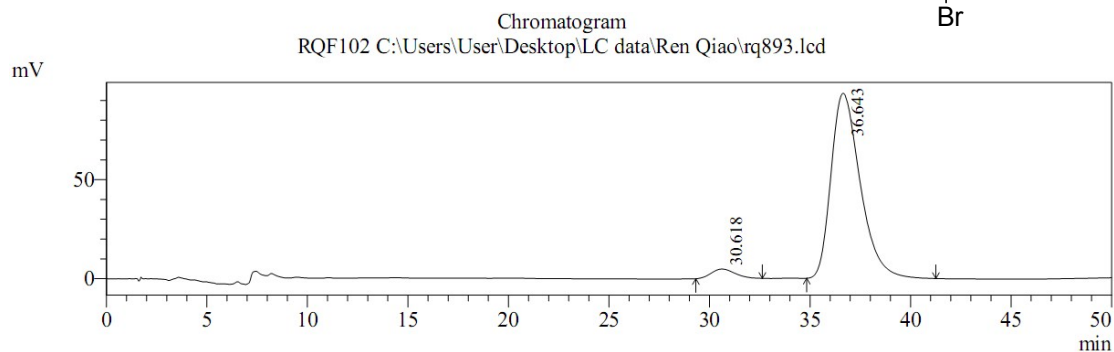

Detector A Ch1 254nm

| Peak# | Ret. Time | Area    | Height | Area %  | Height % |
|-------|-----------|---------|--------|---------|----------|
| 1     | 30.618    | 394865  | 4819   | 4.020   | 4.904    |
| 2     | 36.643    | 9428101 | 93460  | 95.980  | 95.096   |
| Total |           | 9822966 | 98279  | 100.000 | 100.000  |

**Racemic 3d**



## ==== Shimadzu LCsolution Analysis Report ====

C:\Users\User\Desktop\LC data\Ren Qiao\rq888.lcd  
 Acquired by : Admin  
 Sample Name : RQF091  
 Sample ID : RQ  
 Data File Name : rq888.lcd  
 Method File Name : 40%IPA, 1ml-min, 40min.lcm  
 Batch File Name :  
 Report File Name : Default.lcr  
 Description : AS-H column with IC guard column ;40%IPA ;1 ml/min

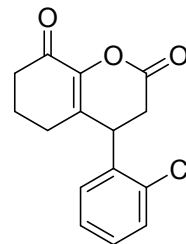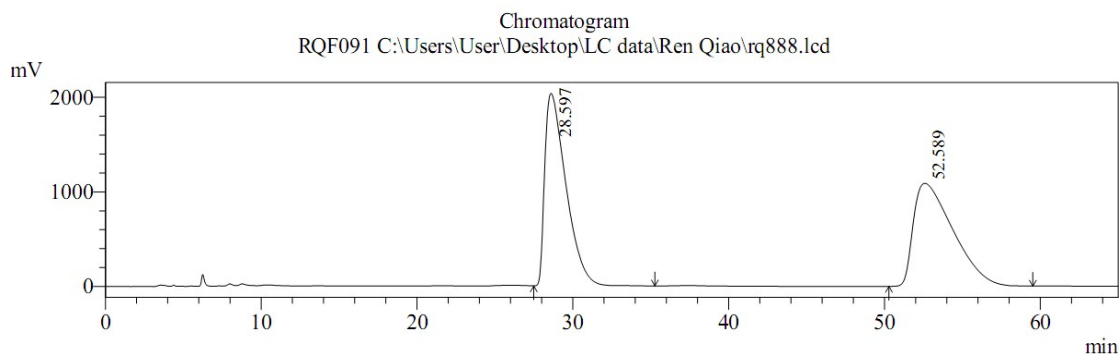

Detector A Ch1 254nm

| Peak# | Ret. Time | Area      | Height  | Area %  | Height % |
|-------|-----------|-----------|---------|---------|----------|
| 1     | 28.597    | 192240044 | 2035204 | 49.947  | 65.147   |
| 2     | 52.589    | 192647224 | 1088818 | 50.053  | 34.853   |
| Total |           | 384887268 | 3124022 | 100.000 | 100.000  |

**Enantiomeric enriched 3d**

## ==== Shimadzu LCsolution Analysis Report ====

C:\Users\User\Desktop\LC data\Ren Qiao\rq889.lcd  
 Acquired by : Admin  
 Sample Name : RQF092  
 Sample ID : RQ  
 Data File Name : rq889.lcd  
 Method File Name : 40%IPA, 1ml-min, 40min.lcm  
 Batch File Name :  
 Report File Name : Default.lcr  
 Description : AS-H column with IC guard column ;40%IPA ;1 ml/min

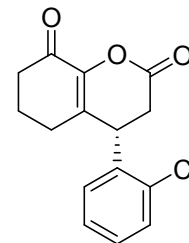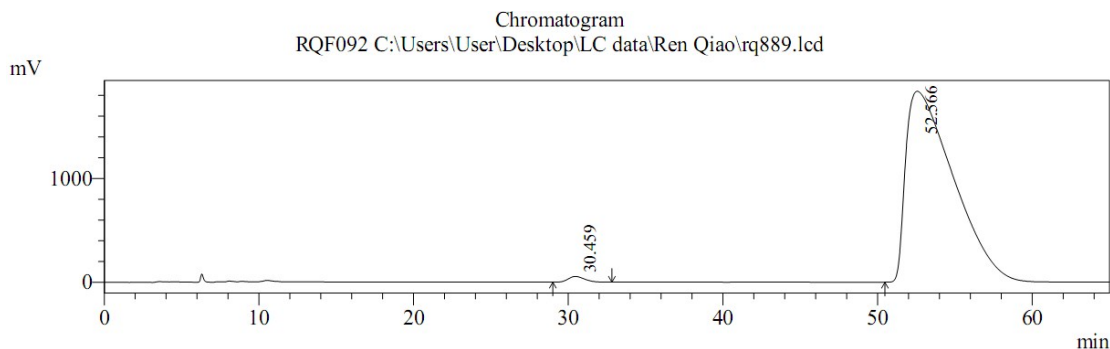

Detector A Ch1 254nm

| Peak# | Ret. Time | Area      | Height  | Area %  | Height % |
|-------|-----------|-----------|---------|---------|----------|
| 1     | 30.459    | 4089470   | 55077   | 1.023   | 2.908    |
| 2     | 52.566    | 395723213 | 1838900 | 98.977  | 97.092   |
| Total |           | 399812683 | 1893978 | 100.000 | 100.000  |

**Racemic 3e**

## ==== Shimadzu LCsolution Analysis Report ====

C:\Users\User\Desktop\LC data\Ren Qiao\rq870.lcd  
 Acquired by : Admin  
 Sample Name : RQF063  
 Sample ID : RQ  
 Data File Name : rq870.lcd  
 Method File Name : 40%IPA, 1ml-min, 40min.lcm  
 Batch File Name :  
 Report File Name : Default.lcr  
 Description : AS-H column with IC guard column ;40%IPA ;1 ml/min

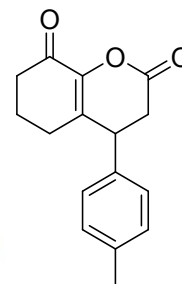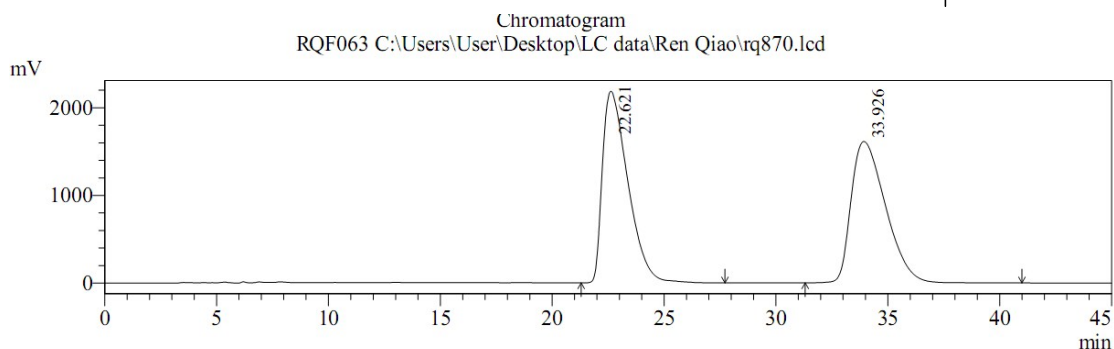

Detector A Ch1 254nm

| Peak# | Ret. Time | Area      | Height  | Area %  | Height % |
|-------|-----------|-----------|---------|---------|----------|
| 1     | 22.621    | 173006355 | 2185867 | 50.045  | 57.526   |
| 2     | 33.926    | 172697787 | 1613918 | 49.955  | 42.474   |
| Total |           | 345704142 | 3799785 | 100.000 | 100.000  |

**Enantiomeric enriched 3e**

## ==== Shimadzu LCsolution Analysis Report ====

C:\Users\User\Desktop\LC data\Ren Qiao\rq871.lcd  
 Acquired by : Admin  
 Sample Name : RQF064  
 Sample ID : RQ  
 Data File Name : rq871.lcd  
 Method File Name : 40%IPA, 1ml-min, 40min.lcm  
 Batch File Name :  
 Report File Name : Default.lcr  
 Description : AS-H column with IC guard column ;40%IPA ;1 ml/min

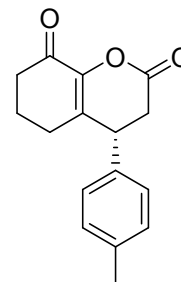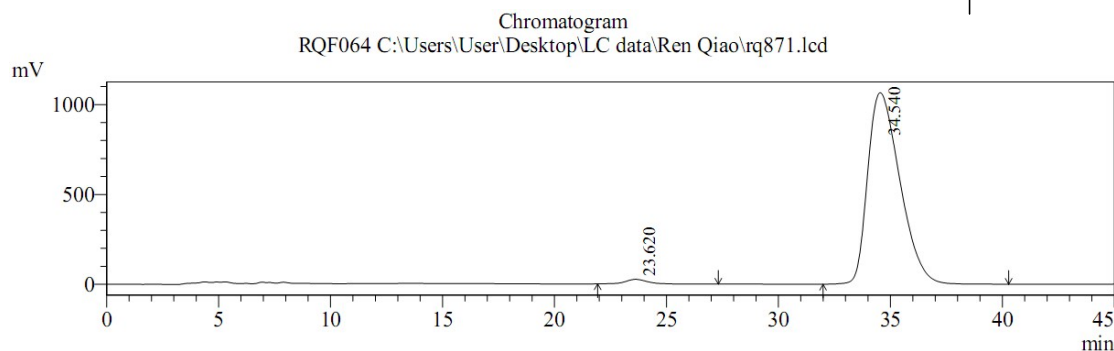

Detector A Ch1 254nm

| Peak# | Ret. Time | Area      | Height  | Area %  | Height % |
|-------|-----------|-----------|---------|---------|----------|
| 1     | 23.620    | 1796780   | 25905   | 1.658   | 2.373    |
| 2     | 34.540    | 106594140 | 1065802 | 98.342  | 97.627   |
| Total |           | 108390920 | 1091707 | 100.000 | 100.000  |

**Racemic 3f**

## ==== Shimadzu LCsolution Analysis Report ====

C:\Users\User\Desktop\LC data\Ren Qiao\rq868.lcd  
 Acquired by : Admin  
 Sample Name : RQF065  
 Sample ID : RQ  
 Data File Name : rq868.lcd  
 Method File Name : 40%IPA, 1ml-min, 40min.lcm  
 Batch File Name :  
 Report File Name : Default.lcr  
 Description : AS-H column with IC guard column ;40%IPA ;1 ml/min

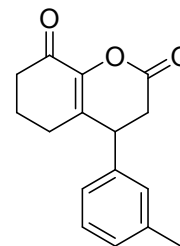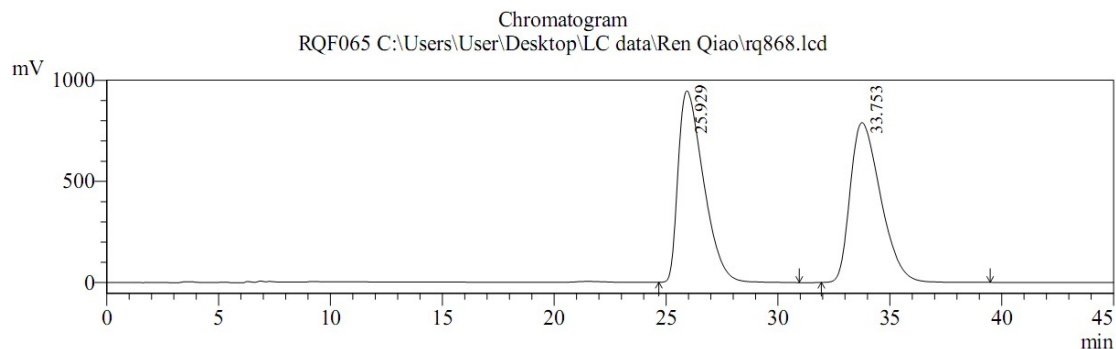

Detector A Ch1 254nm

| Peak# | Ret. Time | Area      | Height  | Area %  | Height % |
|-------|-----------|-----------|---------|---------|----------|
| 1     | 25.929    | 74490492  | 946731  | 49.932  | 54.499   |
| 2     | 33.753    | 74692394  | 790410  | 50.068  | 45.501   |
| Total |           | 149182886 | 1737141 | 100.000 | 100.000  |

**Enantiomeric enriched 3f**

## ==== Shimadzu LCsolution Analysis Report ====

C:\Users\User\Desktop\LC data\Ren Qiao\rq869.lcd  
 Acquired by : Admin  
 Sample Name : RQF066  
 Sample ID : RQ  
 Data File Name : rq869.lcd  
 Method File Name : 40%IPA, 1ml-min, 40min.lcm  
 Batch File Name :  
 Report File Name : Default.lcr  
 Description : AS-H column with IC guard column ;40%IPA ;1 ml/min

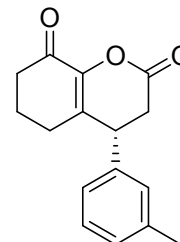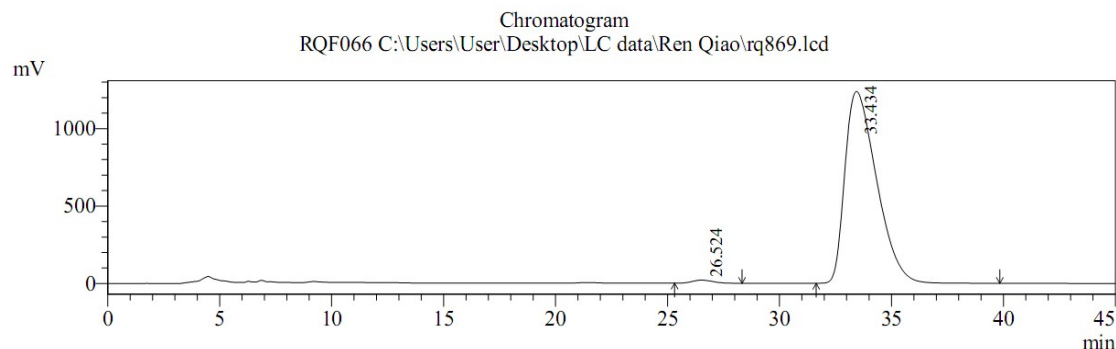

Detector A Ch1 254nm

| Peak# | Ret. Time | Area      | Height  | Area %  | Height % |
|-------|-----------|-----------|---------|---------|----------|
| 1     | 26.524    | 1327168   | 21028   | 1.075   | 1.668    |
| 2     | 33.434    | 122171204 | 1239507 | 98.925  | 98.332   |
| Total |           | 123498371 | 1260536 | 100.000 | 100.000  |

### Racemic 3g

## ==== Shimadzu LCsolution Analysis Report ====

C:\Users\User\Desktop\LC data\Ren Qiao\rq872.lcd  
Acquired by : Admin  
Sample Name : RQF067  
Sample ID : RQ  
Data File Name : rq872.lcd  
Method File Name : 40%IPA, 1ml-min, 40min.lcm  
Batch File Name :  
Report File Name : Default.lcr  
Description : AS-H column with IC guard column ;40%IPA ;1 ml/min

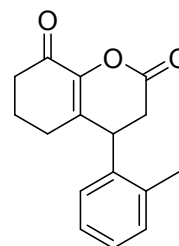

Chromatogram  
RQF067 C:\Users\User\Desktop\LC data\Ren Qiao\rq872.lcd

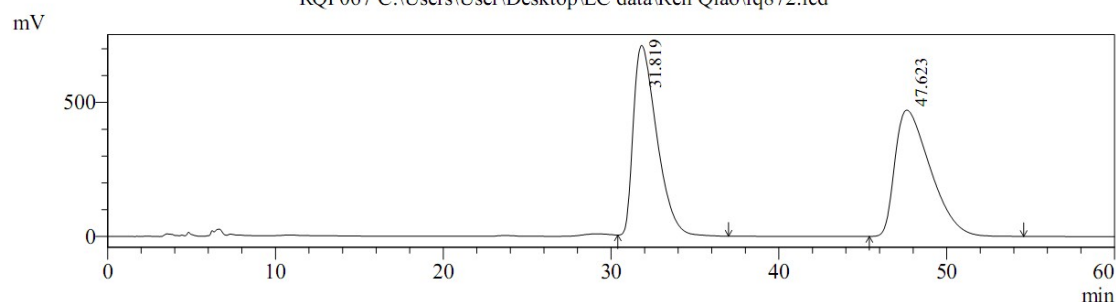

Detector A Ch1 254nm

| Peak# | Ret. Time | Area      | Height  | Area %  | Height % |
|-------|-----------|-----------|---------|---------|----------|
| 1     | 31.819    | 68701310  | 708777  | 49.820  | 60.061   |
| 2     | 47.623    | 69196720  | 471327  | 50.180  | 39.939   |
| Total |           | 137898029 | 1180104 | 100.000 | 100.000  |

### Enantiomeric enriched 3g

## ==== Shimadzu LCsolution Analysis Report ====

C:\Users\User\Desktop\LC data\Ren Qiao\rq873.lcd  
Acquired by : Admin  
Sample Name : RQF068  
Sample ID : RQ  
Data File Name : rq873.lcd  
Method File Name : 40%IPA, 1ml-min, 40min.lcm  
Batch File Name :  
Report File Name : Default.lcr  
Description : AS-H column with IC guard column ;40%IPA ;1 ml/min

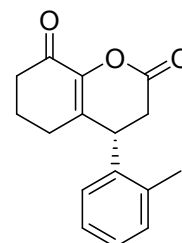

Chromatogram  
RQF068 C:\Users\User\Desktop\LC data\Ren Qiao\rq873.lcd

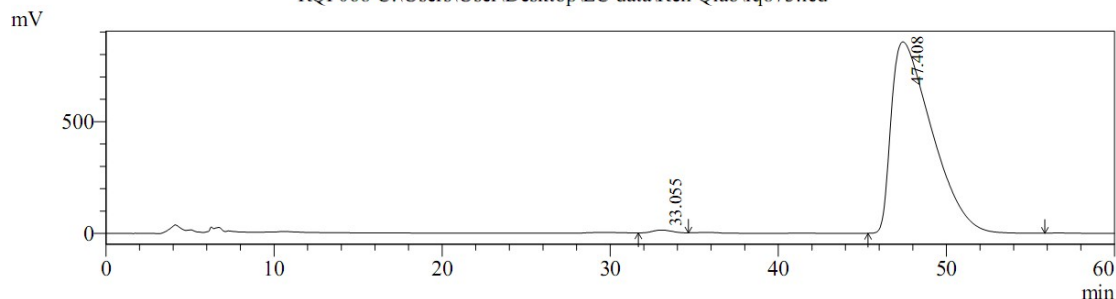

Detector A Ch1 254nm

| Peak# | Ret. Time | Area      | Height | Area %  | Height % |
|-------|-----------|-----------|--------|---------|----------|
| 1     | 33.055    | 1038714   | 13464  | 0.716   | 1.548    |
| 2     | 47.408    | 144016561 | 856071 | 99.284  | 98.452   |
| Total |           | 145055275 | 869535 | 100.000 | 100.000  |

### Racemic 3h

## ==== Shimadzu LCsolution Analysis Report ====

C:\Users\User\Desktop\LC data\Ren Qiao\rq876.lcd  
Acquired by : Admin  
Sample Name : RQF071  
Sample ID : RQ  
Data File Name : rq876.lcd  
Method File Name : 40%IPA, 1ml-min, 40min.lcm  
Batch File Name :  
Report File Name : Default.lcr  
Description :AS-H column with IC guard column ;40%IPA ;1 ml/min

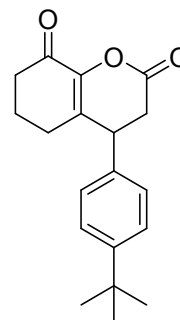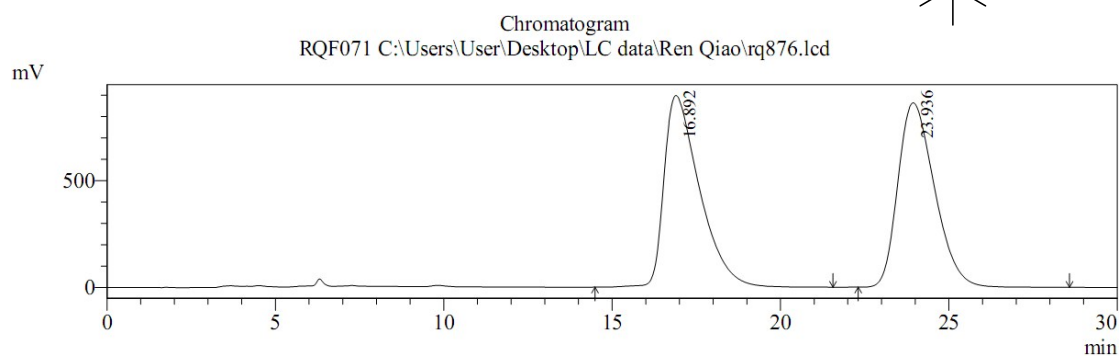

Detector A Ch1 254nm

| Peak# | Ret. Time | Area      | Height  | Area %  | Height % |
|-------|-----------|-----------|---------|---------|----------|
| 1     | 16.892    | 65795068  | 897646  | 50.230  | 50.974   |
| 2     | 23.936    | 65193182  | 863350  | 49.770  | 49.026   |
| Total |           | 130988250 | 1760996 | 100.000 | 100.000  |

### Enantiomeric enriched 3h

## ==== Shimadzu LCsolution Analysis Report ====

C:\Users\User\Desktop\LC data\Ren Qiao\rq877.lcd  
Acquired by : Admin  
Sample Name : RQF072  
Sample ID : RQ  
Data File Name : rq877.lcd  
Method File Name : 40%IPA, 1ml-min, 40min.lcm  
Batch File Name :  
Report File Name : Default.lcr  
Description :AS-H column with IC guard column ;40%IPA ;1 ml/min

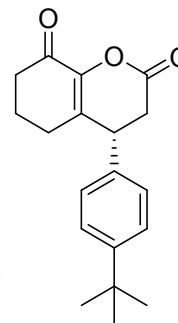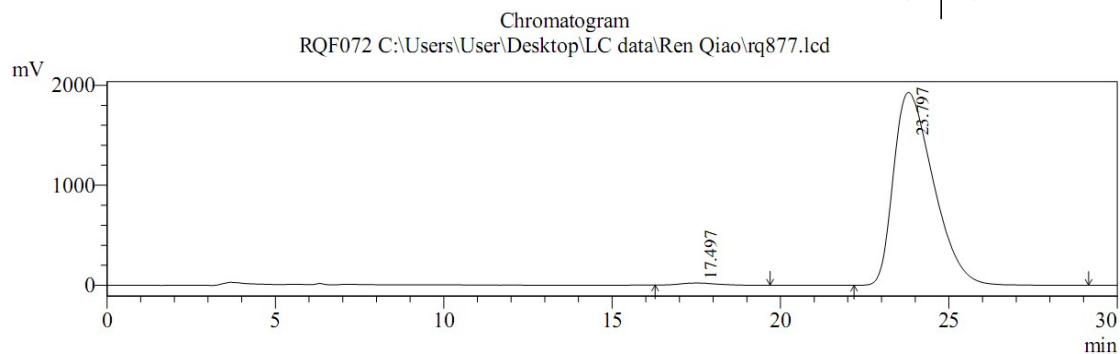

Detector A Ch1 254nm

| Peak# | Ret. Time | Area      | Height  | Area %  | Height % |
|-------|-----------|-----------|---------|---------|----------|
| 1     | 17.497    | 1544234   | 21760   | 0.964   | 1.117    |
| 2     | 23.797    | 158573619 | 1926962 | 99.036  | 98.883   |
| Total |           | 160117854 | 1948722 | 100.000 | 100.000  |

### Racemic 3i

## ==== Shimadzu LCsolution Analysis Report ====

C:\Users\User\Desktop\LC data\Ren Qiao\rq886.lcd  
Acquired by : Admin  
Sample Name : RQF095  
Sample ID : RQ  
Data File Name : rq886.lcd  
Method File Name : 40%IPA, 1ml-min, 40min.lcm  
Batch File Name :  
Report File Name : Default.lcr  
Description : AS-H column with IC guard column ;40%IPA ;1 ml/min

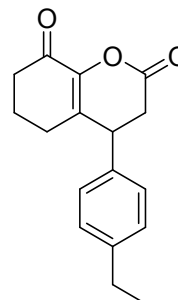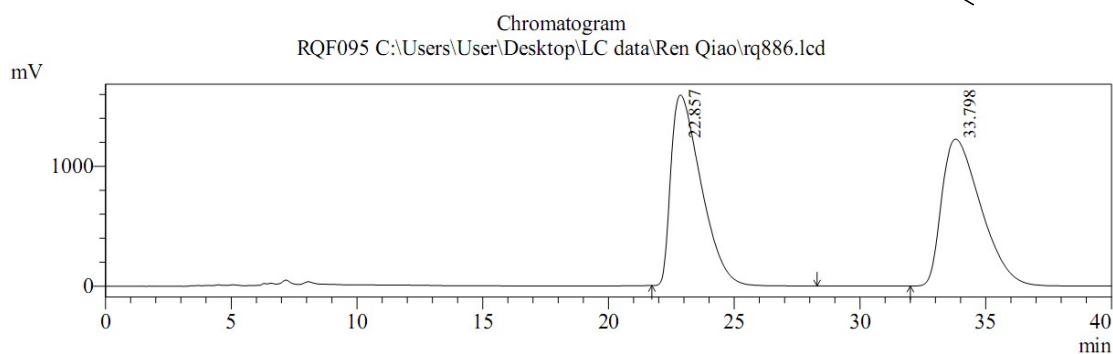

Detector A Ch1 254nm

| Peak# | Ret. Time | Area      | Height  | Area %  | Height % |
|-------|-----------|-----------|---------|---------|----------|
| 1     | 22.857    | 132528842 | 1589696 | 49.901  | 56.469   |
| 2     | 33.798    | 133054598 | 1225492 | 50.099  | 43.531   |
| Total |           | 265583441 | 2815188 | 100.000 | 100.000  |

### Enantiomeric enriched 3i

## ==== Shimadzu LCsolution Analysis Report ====

C:\Users\User\Desktop\LC data\Ren Qiao\rq887.lcd  
Acquired by : Admin  
Sample Name : RQF096  
Sample ID : RQ  
Data File Name : rq887.lcd  
Method File Name : 40%IPA, 1ml-min, 40min.lcm  
Batch File Name :  
Report File Name : Default.lcr  
Description : AS-H column with IC guard column ;40%IPA ;1 ml/min

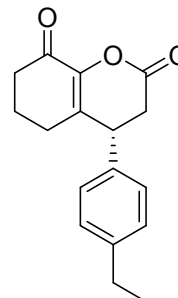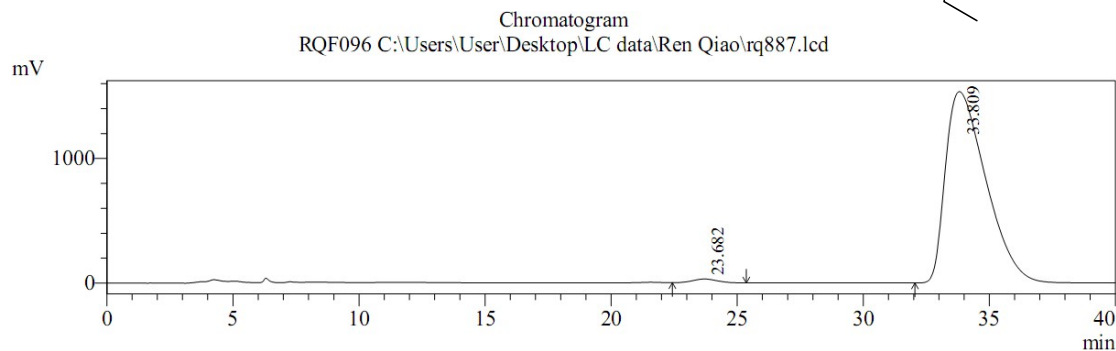

Detector A Ch1 254nm

| Peak# | Ret. Time | Area      | Height  | Area %  | Height % |
|-------|-----------|-----------|---------|---------|----------|
| 1     | 23.682    | 2012876   | 30193   | 1.160   | 1.928    |
| 2     | 33.809    | 171543355 | 1536233 | 98.840  | 98.072   |
| Total |           | 173556231 | 1566426 | 100.000 | 100.000  |

### Racemic 3j

## ==== Shimadzu LCsolution Analysis Report ====

C:\Users\User\Desktop\LC data\Ren Qiao\rq890.lcd  
Acquired by : Admin  
Sample Name : RQF093  
Sample ID : RQ  
Data File Name : rq890.lcd  
Method File Name : 40%IPA, 1ml-min, 40min.lcm  
Batch File Name :  
Report File Name : Default.lcr  
Description :AS-H column with IC guard column ;40%IPA ;1 ml/min

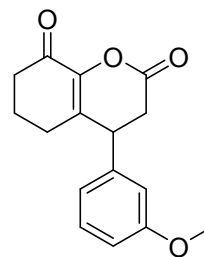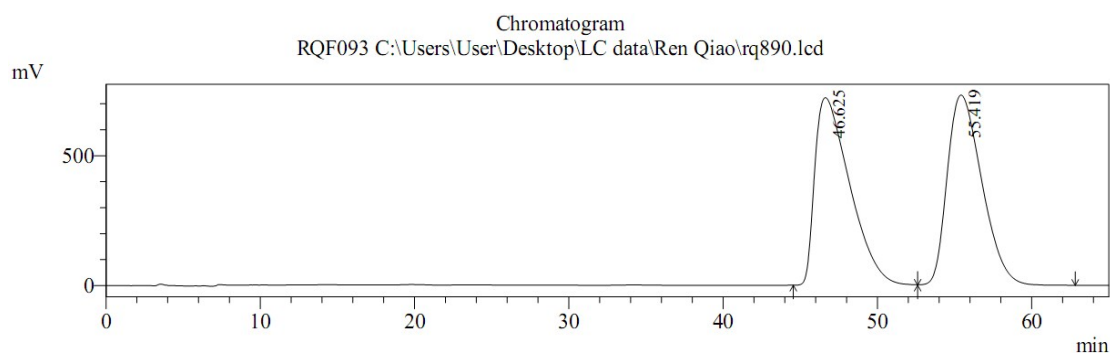

Detector A Ch1 254nm

| Peak# | Ret. Time | Area      | Height  | Area %  | Height % |
|-------|-----------|-----------|---------|---------|----------|
| 1     | 46.625    | 113953899 | 722193  | 49.906  | 49.655   |
| 2     | 55.419    | 114384305 | 732242  | 50.094  | 50.345   |
| Total |           | 228338204 | 1454435 | 100.000 | 100.000  |

### Enantiomeric enriched 3j

## ==== Shimadzu LCsolution Analysis Report ====

C:\Users\User\Desktop\LC data\Ren Qiao\rq891.lcd  
Acquired by : Admin  
Sample Name : RQF094  
Sample ID : RQ  
Data File Name : rq891.lcd  
Method File Name : 40%IPA, 1ml-min, 40min.lcm  
Batch File Name :  
Report File Name : Default.lcr  
Description :AS-H column with IC guard column ;40%IPA ;1 ml/min

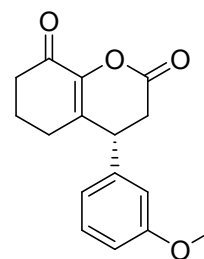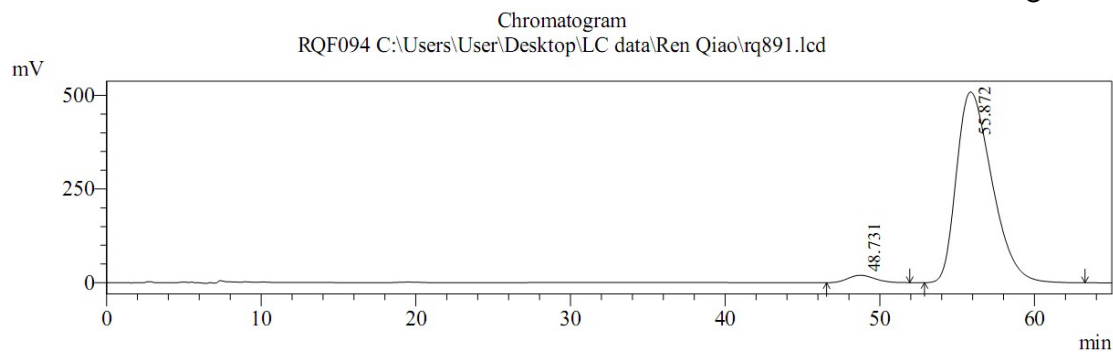

Detector A Ch1 254nm

| Peak# | Ret. Time | Area     | Height | Area %  | Height % |
|-------|-----------|----------|--------|---------|----------|
| 1     | 48.731    | 2395578  | 19828  | 2.872   | 3.754    |
| 2     | 55.872    | 81029889 | 508418 | 97.128  | 96.246   |
| Total |           | 83425467 | 528247 | 100.000 | 100.000  |

### Racemic 3k

## ==== Shimadzu LCsolution Analysis Report ====

C:\Users\User\Desktop\LC data\Ren Qiao\rq882.lcd  
Acquired by : Admin  
Sample Name : RQF083  
Sample ID : RQ  
Data File Name : rq882.lcd  
Method File Name : 40%IPA, 1ml-min, 40min.lcm  
Batch File Name :  
Report File Name : Default.lcr  
Description : AS-H column with IC guard column ;40%IPA ;1 ml/min

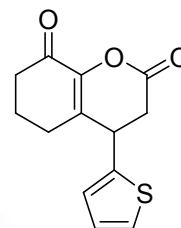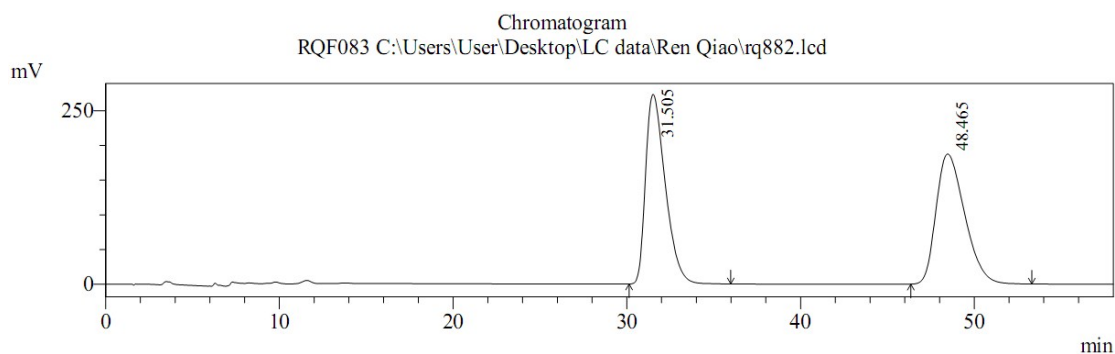

Detector A Ch1 254nm

| Peak# | Ret. Time | Area     | Height | Area %  | Height % |
|-------|-----------|----------|--------|---------|----------|
| 1     | 31.505    | 21481805 | 273059 | 50.043  | 59.320   |
| 2     | 48.465    | 21444927 | 187255 | 49.957  | 40.680   |
| Total |           | 42926731 | 460314 | 100.000 | 100.000  |

### Enantiomeric enriched 3k

## ==== Shimadzu LCsolution Analysis Report ====

C:\Users\User\Desktop\LC data\Ren Qiao\rq883.lcd  
Acquired by : Admin  
Sample Name : RQF084  
Sample ID : RQ  
Data File Name : rq883.lcd  
Method File Name : 40%IPA, 1ml-min, 40min.lcm  
Batch File Name :  
Report File Name : Default.lcr  
Description : AS-H column with IC guard column ;40%IPA ;1 ml/min

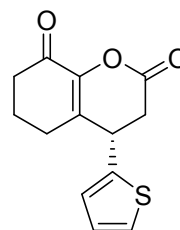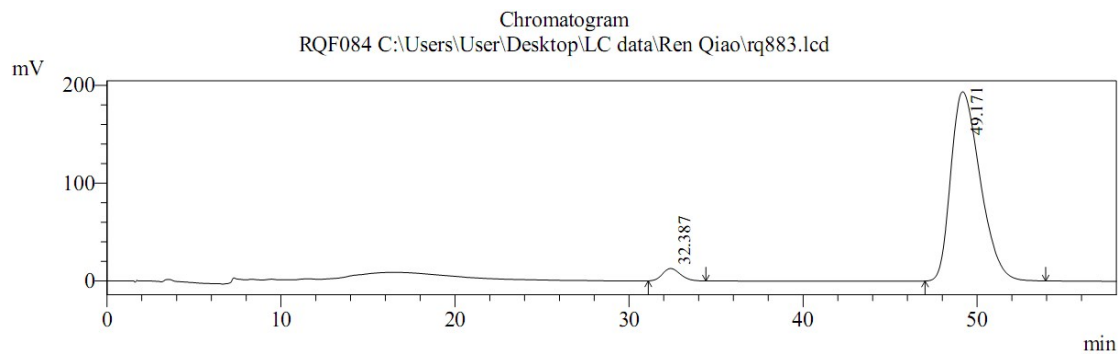

Detector A Ch1 254nm

| Peak# | Ret. Time | Area     | Height | Area %  | Height % |
|-------|-----------|----------|--------|---------|----------|
| 1     | 32.387    | 903406   | 12670  | 3.837   | 6.148    |
| 2     | 49.171    | 22642725 | 193424 | 96.163  | 93.852   |
| Total |           | 23546132 | 206094 | 100.000 | 100.000  |



### Racemic 3I

## ==== Shimadzu LCsolution Analysis Report ====

C:\Users\User\Desktop\LC data\Ren Qiao\rq880.lcd  
Acquired by : Admin  
Sample Name : RQF075  
Sample ID : RQ  
Data File Name : rq880.lcd  
Method File Name : 40%IPA, 1ml-min, 40min.lcm  
Batch File Name :  
Report File Name : Default.lcr  
Description : AS-H column with IC guard column ;40%IPA ;1 ml/min

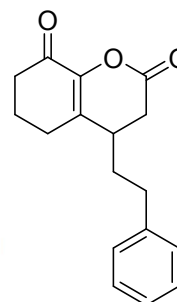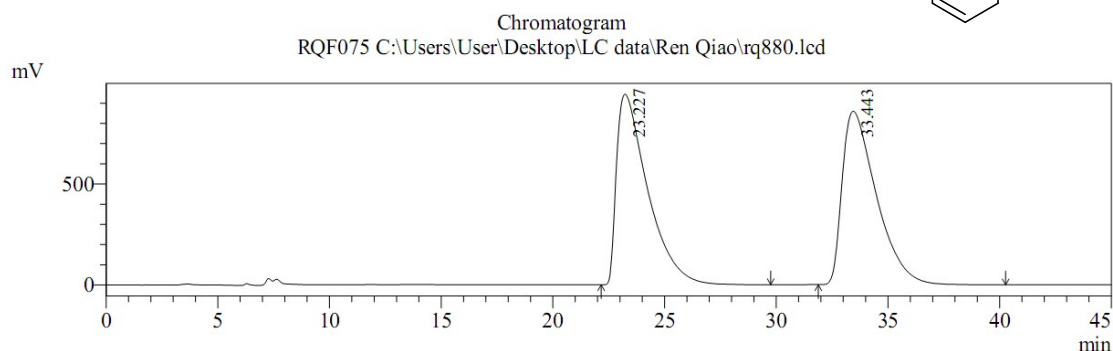

Detector A Ch1 254nm

| Peak# | Ret. Time | Area      | Height  | Area %  | Height % |
|-------|-----------|-----------|---------|---------|----------|
| 1     | 23.227    | 91443455  | 943659  | 49.986  | 52.343   |
| 2     | 33.443    | 91493288  | 859161  | 50.014  | 47.657   |
| Total |           | 182936743 | 1802820 | 100.000 | 100.000  |

### Enantiomeric enriched 3I

## ==== Shimadzu LCsolution Analysis Report ====

C:\Users\User\Desktop\LC data\Ren Qiao\rq881.lcd  
Acquired by : Admin  
Sample Name : RQF076  
Sample ID : RQ  
Data File Name : rq881.lcd  
Method File Name : 40%IPA, 1ml-min, 40min.lcm  
Batch File Name :  
Report File Name : Default.lcr  
Description : AS-H column with IC guard column ;40%IPA ;1 ml/min

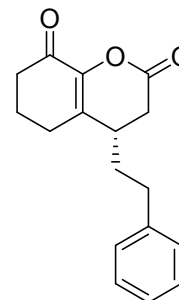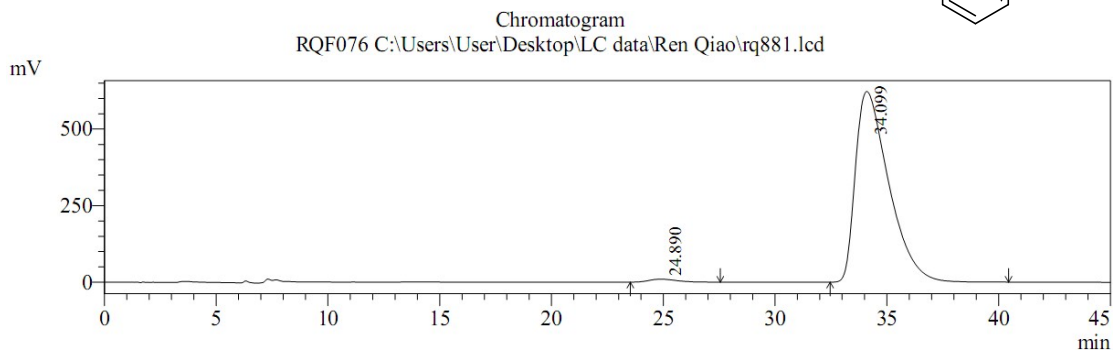

Detector A Ch1 254nm

| Peak# | Ret. Time | Area     | Height | Area %  | Height % |
|-------|-----------|----------|--------|---------|----------|
| 1     | 24.890    | 857472   | 10138  | 1.309   | 1.602    |
| 2     | 34.099    | 64647886 | 622841 | 98.691  | 98.398   |
| Total |           | 65505358 | 632979 | 100.000 | 100.000  |

### Racemic 3m

## ==== Shimadzu LCsolution Analysis Report ====

C:\Users\User\Desktop\LC data\Ren Qiao\rq884.lcd  
Acquired by : Admin  
Sample Name : RQF085  
Sample ID : RQ  
Data File Name : rq884.lcd  
Method File Name : 40%IPA, 1ml-min, 40min.lcm  
Batch File Name :  
Report File Name : Default.lcr  
Description : AS-H column with IC guard column ;40%IPA ;1 ml/min

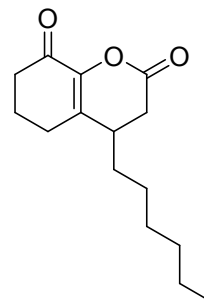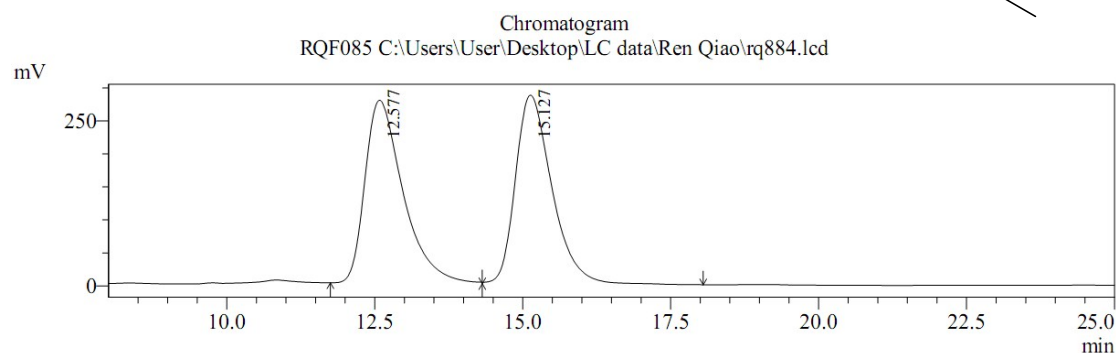

Detector A Ch1 254nm

| Peak# | Ret. Time | Area     | Height | Area %  | Height % |
|-------|-----------|----------|--------|---------|----------|
| 1     | 12.577    | 12423577 | 277306 | 50.289  | 49.206   |
| 2     | 15.127    | 12280659 | 286250 | 49.711  | 50.794   |
| Total |           | 24704236 | 563556 | 100.000 | 100.000  |

### Enantiomeric enriched 3m

## ==== Shimadzu LCsolution Analysis Report ====

C:\Users\User\Desktop\LC data\Ren Qiao\rq885.lcd  
Acquired by : Admin  
Sample Name : RQF086  
Sample ID : RQ  
Data File Name : rq885.lcd  
Method File Name : 40%IPA, 1ml-min, 40min.lcm  
Batch File Name :  
Report File Name : Default.lcr  
Description : AS-H column with IC guard column ;40%IPA ;1 ml/min

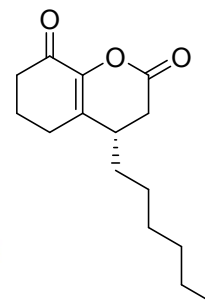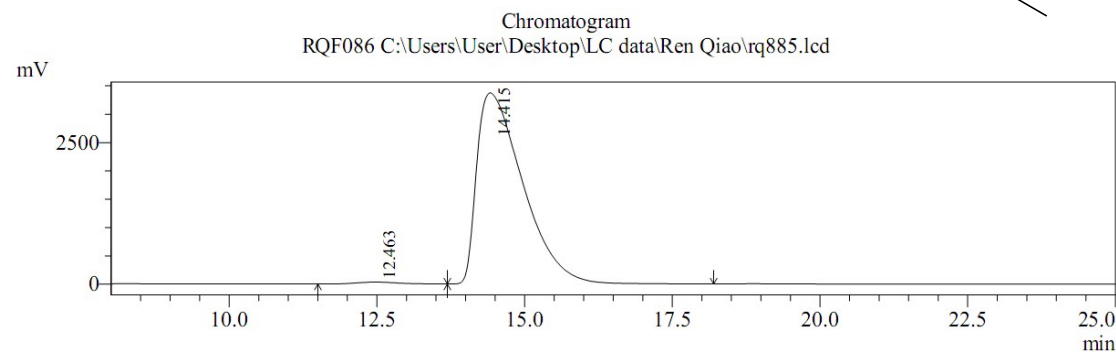

Detector A Ch1 254nm

| Peak# | Ret. Time | Area      | Height  | Area %  | Height % |
|-------|-----------|-----------|---------|---------|----------|
| 1     | 12.463    | 1683380   | 34710   | 0.911   | 1.019    |
| 2     | 14.415    | 183016281 | 3373117 | 99.089  | 98.981   |
| Total |           | 184699661 | 3407827 | 100.000 | 100.000  |

### Racemic 3n

## ==== Shimadzu LCsolution Analysis Report ====

C:\Users\User\Desktop\LC data\Ren Qiao\rq878.lcd

Acquired by : Admin

Sample Name : RQF077

Sample ID : RQ

Data File Name : rq878.lcd

Method File Name : 40%IPA, 1ml-min, 40min.lcm

Batch File Name :

Report File Name : Default.lcr

Description : AS-H column with IC guard column ;40%IPA ;1 ml/min

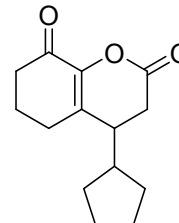

Chromatogram  
RQF077 C:\Users\User\Desktop\LC data\Ren Qiao\rq878.lcd

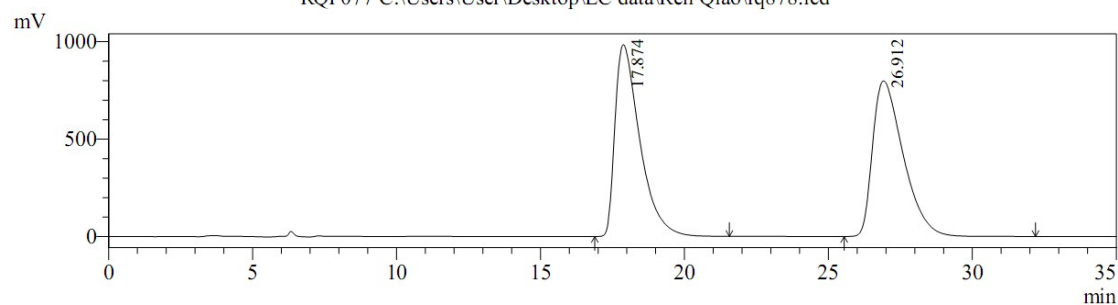

Detector A Ch1 254nm

| Peak# | Ret. Time | Area      | Height  | Area %  | Height % |
|-------|-----------|-----------|---------|---------|----------|
| 1     | 17.874    | 58891572  | 983999  | 49.928  | 55.196   |
| 2     | 26.912    | 59060933  | 798745  | 50.072  | 44.804   |
| Total |           | 117952505 | 1782744 | 100.000 | 100.000  |

### Enantiomeric enriched 3n

## ==== Shimadzu LCsolution Analysis Report ====

C:\Users\User\Desktop\LC data\Ren Qiao\rq879.lcd

Acquired by : Admin

Sample Name : RQF078

Sample ID : RQ

Data File Name : rq879.lcd

Method File Name : 40%IPA, 1ml-min, 40min.lcm

Batch File Name :

Report File Name : Default.lcr

Description : AS-H column with IC guard column ;40%IPA ;1 ml/min

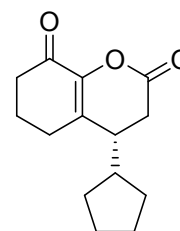

Chromatogram  
RQF078 C:\Users\User\Desktop\LC data\Ren Qiao\rq879.lcd

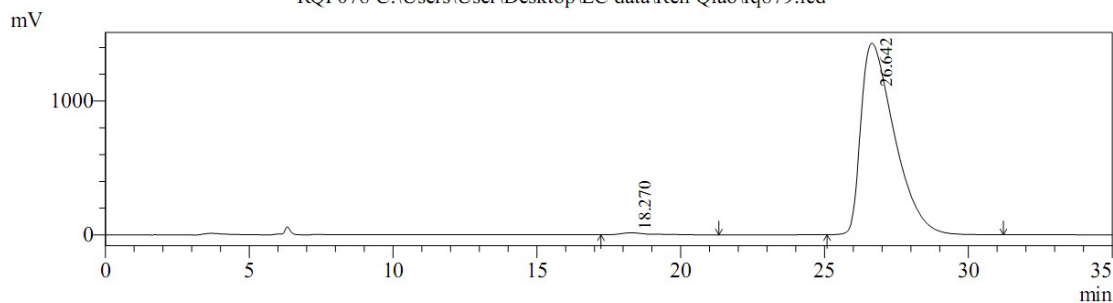

Detector A Ch1 254nm

| Peak# | Ret. Time | Area      | Height  | Area %  | Height % |
|-------|-----------|-----------|---------|---------|----------|
| 1     | 18.270    | 1040264   | 15260   | 0.891   | 1.056    |
| 2     | 26.642    | 115689646 | 1429696 | 99.109  | 98.944   |
| Total |           | 116729910 | 1444956 | 100.000 | 100.000  |

### Racemic 3o

## ==== Shimadzu LCsolution Analysis Report ====

C:\Users\User\Desktop\LC data\Ren Qiao\rq894.lcd  
Acquired by : Admin  
Sample Name : RQF106  
Sample ID : RQ  
Data File Name : rq894.lcd  
Method File Name : 40%IPA, 1ml-min, 40min.lcm  
Batch File Name :  
Report File Name : Default.lcr  
Description : AS-H column with IC guard column ;40%IPA ;1 ml/min

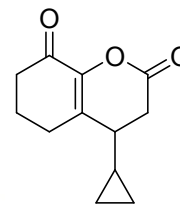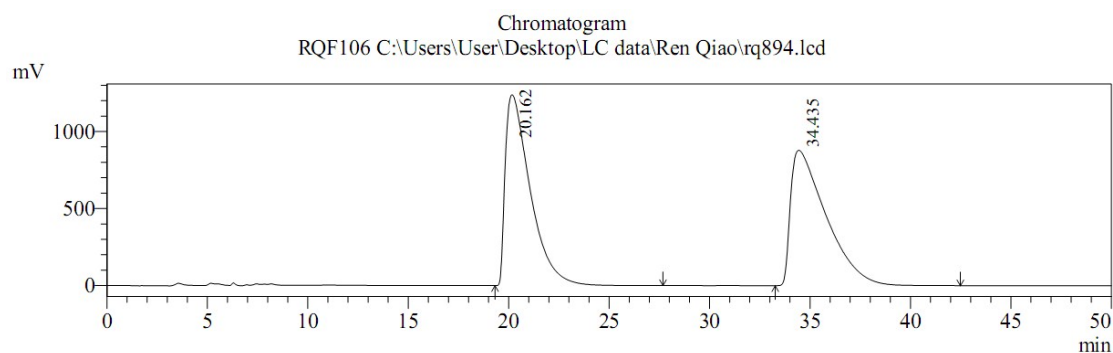

Detector A Ch1 254nm

| Peak# | Ret. Time | Area      | Height  | Area %  | Height % |
|-------|-----------|-----------|---------|---------|----------|
| 1     | 20.162    | 106967403 | 1238392 | 49.724  | 58.493   |
| 2     | 34.435    | 108152783 | 878765  | 50.276  | 41.507   |
| Total |           | 215120187 | 2117157 | 100.000 | 100.000  |

### Enantiomeric enriched 3o

## ==== Shimadzu LCsolution Analysis Report ====

C:\Users\User\Desktop\LC data\Ren Qiao\rq895.lcd  
Acquired by : Admin  
Sample Name : RQF107  
Sample ID : RQ  
Data File Name : rq895.lcd  
Method File Name : 40%IPA, 1ml-min, 40min.lcm  
Batch File Name :  
Report File Name : Default.lcr  
Description : AS-H column with IC guard column ;40%IPA ;1 ml/min

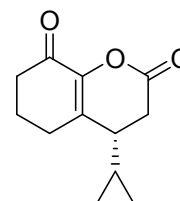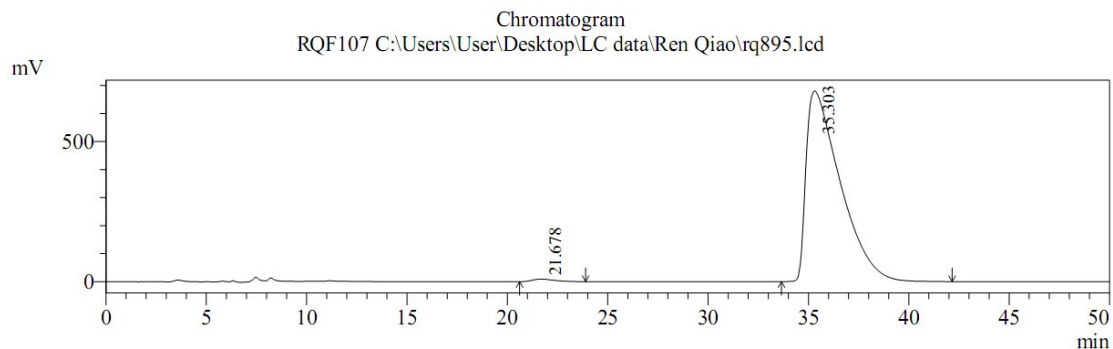

Detector A Ch1 254nm

| Peak# | Ret. Time | Area     | Height | Area %  | Height % |
|-------|-----------|----------|--------|---------|----------|
| 1     | 21.678    | 658965   | 9120   | 0.812   | 1.323    |
| 2     | 35.303    | 80518143 | 680075 | 99.188  | 98.677   |
| Total |           | 81177109 | 689195 | 100.000 | 100.000  |

### Racemic 3p

## ==== Shimadzu LCsolution Analysis Report ====

C:\Users\User\Desktop\LC data\Ren Qiao\rq896.lcd  
Acquired by : Admin  
Sample Name : RQF109  
Sample ID : RQ  
Data File Name : rq896.lcd  
Method File Name : 40%IPA, 1ml-min, 40min.lcm  
Batch File Name :  
Report File Name : Default.lcr  
Description : AS-H column with IC guard column ;40%IPA ;1 ml/min

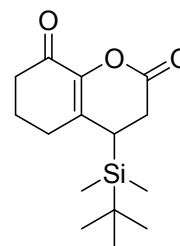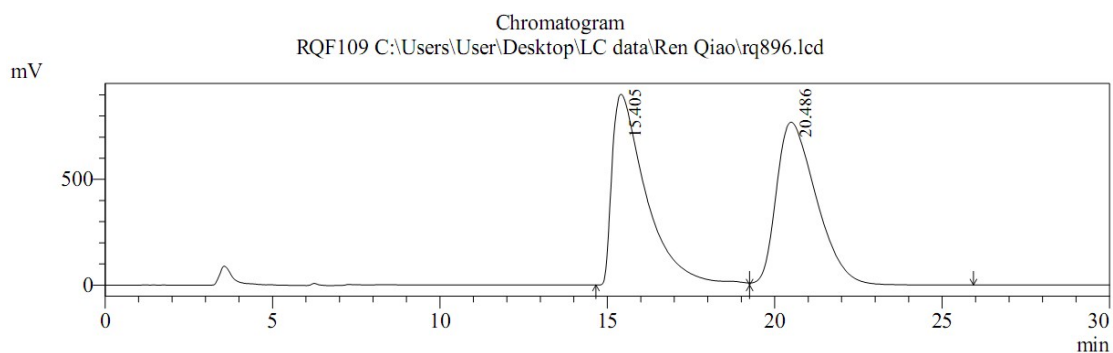

Detector A Ch1 254nm

| Peak# | Ret. Time | Area      | Height  | Area %  | Height % |
|-------|-----------|-----------|---------|---------|----------|
| 1     | 15.405    | 64302756  | 903012  | 50.103  | 53.956   |
| 2     | 20.486    | 64038072  | 770592  | 49.897  | 46.044   |
| Total |           | 128340827 | 1673604 | 100.000 | 100.000  |

### Enantiomeric enriched 3p

## ==== Shimadzu LCsolution Analysis Report ====

C:\Users\User\Desktop\LC data\Ren Qiao\rq897.lcd  
Acquired by : Admin  
Sample Name : RQF110  
Sample ID : RQ  
Data File Name : rq897.lcd  
Method File Name : 40%IPA, 1ml-min, 40min.lcm  
Batch File Name :  
Report File Name : Default.lcr  
Description : AS-H column with IC guard column ;40%IPA ;1 ml/min

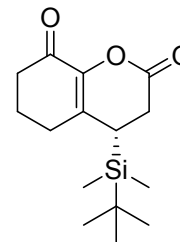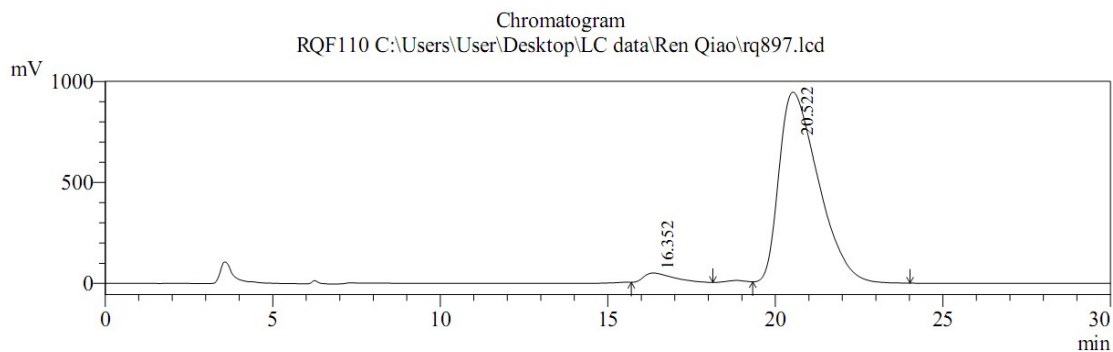

Detector A Ch1 254nm

| Peak# | Ret. Time | Area     | Height | Area %  | Height % |
|-------|-----------|----------|--------|---------|----------|
| 1     | 16.352    | 2772977  | 46206  | 3.499   | 4.680    |
| 2     | 20.522    | 76482027 | 941014 | 96.501  | 95.320   |
| Total |           | 79255004 | 987220 | 100.000 | 100.000  |
